# Supplementary material for: The EURO-D Measure of Depressive Symptoms in the Aging Population: Comparability Across European Countries and Israel
Source: Frontiers journal article supplement (doi:10.3389/fpos.2021.665004), 2021-08-05
Supplement: Data_Sheet_1.docx [file Data_Sheet_1.docx]

Appendix for Maskileyson, Seddig, & Davidov (2021)

1. Exploratory factor analysis (EFA)

Criteria for factor and item retention (Worthington & Whittaker, [2006](https://doi.org/10.1177/0011000006288127)):

- retain factor if Eigenvalue > 1.00
- retain item if factor loading ≥ 0.32
- delete item if factor loading on two or more factors ≥ 0.32
- delete item if cross loading difference from highest factor loading < 0.15
- Violations are marked yellow

Mplus output and results per country:

- 1. AT

The third factor is substantively meaningless and is not considered.

EIGENVALUES FOR SAMPLE CORRELATION MATRIX

1 2 3 4 5

________ ________ ________ ________ ________

4.790 1.447 1.021 0.901 0.779

GEOMIN ROTATED LOADINGS (* significant at 5% level)

1 2

________ ________

EURO1 0.866* 0.036

EURO2 -0.138 0.674*

EURO3 0.237 0.562*

EURO4 0.533* -0.028

EURO5 0.436* 0.164*

EURO6 0.062 0.780*

EURO7 0.477* 0.005

EURO8 0.166 0.550*

EURO9 0.311* 0.546*

EURO10 -0.016 0.651*

EURO11 -0.238* 0.499*

EURO12 0.642* -0.022

- 1. DE

EIGENVALUES FOR SAMPLE CORRELATION MATRIX

1 2 3 4 5

________ ________ ________ ________ ________

4.464 1.256 0.970 0.828 0.812

GEOMIN ROTATED LOADINGS (* significant at 5% level)

1 2

________ ________

EURO1 0.914* -0.004

EURO2 -0.137 0.639*

EURO3 0.262* 0.526*

EURO4 0.366* 0.214*

EURO5 0.259* 0.302*

EURO6 0.021 0.683*

EURO7 0.287* 0.239*

EURO8 0.081 0.510*

EURO9 0.068 0.588*

EURO10 -0.115 0.655*

EURO11 -0.142* 0.469*

EURO12 0.697* 0.025

- 1. SE

The third factor is substantively meaningless and is not considered.

EIGENVALUES FOR SAMPLE CORRELATION MATRIX

1 2 3 4 5

________ ________ ________ ________ ________

3.966 1.385 1.004 0.894 0.862

GEOMIN ROTATED LOADINGS (* significant at 5% level)

1 2

________ ________

EURO1 1.015* 0.006

EURO2 -0.177* 0.625*

EURO3 0.186* 0.612*

EURO4 0.275* 0.180*

EURO5 0.163* 0.340*

EURO6 -0.001 0.602*

EURO7 0.215* 0.346*

EURO8 0.044 0.548*

EURO9 0.088 0.544*

EURO10 -0.079 0.606*

EURO11 -0.134* 0.349*

EURO12 0.604* -0.022

- 1. ES

EIGENVALUES FOR SAMPLE CORRELATION MATRIX

1 2 3 4 5

________ ________ ________ ________ ________

6.121 1.188 0.869 0.679 0.558

GEOMIN ROTATED LOADINGS (* significant at 5% level)

1 2

________ ________

EURO1 0.920* -0.003

EURO2 -0.149* 0.854*

EURO3 0.519* 0.279*

EURO4 0.595* -0.021

EURO5 0.642* 0.113*

EURO6 0.403* 0.544*

EURO7 0.639* 0.045

EURO8 0.355* 0.341*

EURO9 0.484* 0.256*

EURO10 0.357* 0.422*

EURO11 0.023 0.803*

EURO12 0.771* -0.021

- 1. IT

EIGENVALUES FOR SAMPLE CORRELATION MATRIX

1 2 3 4 5

________ ________ ________ ________ ________

5.437 1.194 0.931 0.772 0.691

GEOMIN ROTATED LOADINGS (* significant at 5% level)

1 2

________ ________

EURO1 0.844* 0.005

EURO2 -0.008 0.566*

EURO3 0.156* 0.502*

EURO4 0.355* 0.241*

EURO5 0.591* 0.081

EURO6 0.310* 0.617*

EURO7 0.610* -0.079

EURO8 0.226* 0.458*

EURO9 0.565* 0.203*

EURO10 0.222* 0.519*

EURO11 -0.019 0.764*

EURO12 0.780* -0.013

- 1. FR

EIGENVALUES FOR SAMPLE CORRELATION MATRIX

1 2 3 4 5

________ ________ ________ ________ ________

4.295 1.512 0.956 0.914 0.705

GEOMIN ROTATED LOADINGS (* significant at 5% level)

1 2

________ ________

EURO1 0.011 0.877*

EURO2 0.630* -0.049

EURO3 0.523* 0.380*

EURO4 0.236* 0.436*

EURO5 0.123* 0.385*

EURO6 0.604* 0.036

EURO7 -0.017 0.470*

EURO8 0.424* 0.156*

EURO9 0.407* 0.297*

EURO10 0.493* 0.016

EURO11 0.675* -0.270*

EURO12 -0.022 0.733*

- 1. DK

EIGENVALUES FOR SAMPLE CORRELATION MATRIX

1 2 3 4 5

________ ________ ________ ________ ________

4.704 1.470 0.998 0.839 0.751

GEOMIN ROTATED LOADINGS (* significant at 5% level)

1 2

________ ________

EURO1 0.016 0.912*

EURO2 0.307* -0.155

EURO3 0.596* 0.277*

EURO4 0.339* 0.356*

EURO5 0.191* 0.350*

EURO6 0.800* -0.026

EURO7 0.242* 0.393*

EURO8 0.599* 0.021

EURO9 0.638* 0.022

EURO10 0.621* 0.015

EURO11 0.629* -0.313*

EURO12 -0.064 0.769*

- 1. GR

EIGENVALUES FOR SAMPLE CORRELATION MATRIX

1 2 3 4 5

________ ________ ________ ________ ________

5.542 1.188 0.928 0.794 0.675

GEOMIN ROTATED LOADINGS (* significant at 5% level)

1 2

________ ________

EURO1 0.853* 0.016

EURO2 0.109 0.593*

EURO3 0.463* 0.227*

EURO4 0.688* -0.256*

EURO5 0.476* 0.215*

EURO6 0.185* 0.540*

EURO7 0.498* -0.068

EURO8 0.411* 0.336*

EURO9 0.459* 0.443*

EURO10 0.155* 0.540*

EURO11 -0.016 0.825*

EURO12 0.703* -0.002

- 1. CH

EIGENVALUES FOR SAMPLE CORRELATION MATRIX

1 2 3 4 5

________ ________ ________ ________ ________

3.834 1.684 0.928 0.869 0.767

GEOMIN ROTATED LOADINGS (* significant at 5% level)

1 2

________ ________

EURO1 0.811* 0.003

EURO2 -0.288* 0.595*

EURO3 0.320* 0.500*

EURO4 0.434* 0.179*

EURO5 0.395* 0.186*

EURO6 0.000 0.525*

EURO7 0.374* 0.163*

EURO8 0.177 0.529*

EURO9 0.439* 0.342*

EURO10 0.070 0.531*

EURO11 -0.291* 0.512*

EURO12 0.684* -0.022

- 1. BE

EIGENVALUES FOR SAMPLE CORRELATION MATRIX

1 2 3 4 5

________ ________ ________ ________ ________

4.422 1.375 0.953 0.868 0.761

GEOMIN ROTATED LOADINGS (* significant at 5% level)

1 2

________ ________

EURO1 0.914* 0.006

EURO2 -0.097 0.489*

EURO3 0.363* 0.497*

EURO4 0.447* 0.166*

EURO5 0.269* 0.298*

EURO6 0.178* 0.531*

EURO7 0.332* 0.284*

EURO8 0.135* 0.456*

EURO9 0.247* 0.519*

EURO10 0.002 0.503*

EURO11 -0.223* 0.723*

EURO12 0.708* -0.070

- 1. ISR

EIGENVALUES FOR SAMPLE CORRELATION MATRIX

1 2 3 4 5

________ ________ ________ ________ ________

5.200 1.512 0.969 0.835 0.689

GEOMIN ROTATED LOADINGS (* significant at 5% level)

1 2

________ ________

EURO1 0.904* -0.003

EURO2 0.108 0.310*

EURO3 0.440* 0.188

EURO4 0.841* -0.308*

EURO5 0.559* 0.164*

EURO6 0.148 0.617*

EURO7 0.570* 0.018

EURO8 0.199* 0.539*

EURO9 0.385* 0.442*

EURO10 0.002 0.810*

EURO11 -0.031 0.754*

EURO12 0.739* 0.014

- 1. CZ

EIGENVALUES FOR SAMPLE CORRELATION MATRIX

1 2 3 4 5

________ ________ ________ ________ ________

4.870 1.313 0.989 0.791 0.680

GEOMIN ROTATED LOADINGS (* significant at 5% level)

1 2

________ ________

EURO1 0.871* -0.026

EURO2 -0.066 0.486*

EURO3 0.404* 0.431*

EURO4 0.300* 0.177*

EURO5 0.364* 0.284*

EURO6 0.006 0.792*

EURO7 0.573* 0.082

EURO8 0.213* 0.503*

EURO9 0.297* 0.360*

EURO10 0.053 0.599*

EURO11 -0.111 0.828*

EURO12 0.661* 0.010

- 1. PL

EIGENVALUES FOR SAMPLE CORRELATION MATRIX

1 2 3 4 5

________ ________ ________ ________ ________

4.821 1.575 0.997 0.772 0.716

GEOMIN ROTATED LOADINGS (* significant at 5% level)

1 2

________ ________

EURO1 -0.065 0.848*

EURO2 0.729* -0.013

EURO3 0.333* 0.531*

EURO4 -0.071 0.605*

EURO5 0.000 0.645*

EURO6 0.258* 0.458*

EURO7 -0.174* 0.738*

EURO8 0.139 0.451*

EURO9 0.031 0.699*

EURO10 0.401* 0.404*

EURO11 0.562* 0.052

EURO12 0.094 0.722*

- 1. LUX

EIGENVALUES FOR SAMPLE CORRELATION MATRIX

1 2 3 4 5

________ ________ ________ ________ ________

4.465 1.324 0.998 0.910 0.824

GEOMIN ROTATED LOADINGS (* significant at 5% level)

1 2

________ ________

EURO1 0.919* -0.009

EURO2 0.021 0.527*

EURO3 0.370* 0.498*

EURO4 0.347* 0.172

EURO5 0.272* 0.327*

EURO6 -0.078 0.757*

EURO7 0.370* 0.172*

EURO8 0.296* 0.337*

EURO9 0.253* 0.483*

EURO10 0.010 0.571*

EURO11 -0.148 0.526*

EURO12 0.641* 0.156

- 1. PT

EIGENVALUES FOR SAMPLE CORRELATION MATRIX

1 2 3 4 5

________ ________ ________ ________ ________

5.222 1.346 0.823 0.777 0.711

GEOMIN ROTATED LOADINGS (* significant at 5% level)

1 2

________ ________

EURO1 0.980* -0.151

EURO2 0.072 0.559*

EURO3 0.643* 0.233*

EURO4 0.507* 0.262*

EURO5 0.520* -0.002

EURO6 0.637* 0.211*

EURO7 0.563* 0.014

EURO8 0.520* 0.202*

EURO9 0.531* 0.276*

EURO10 0.324* 0.403*

EURO11 -0.008 0.711*

EURO12 0.759* -0.127

- 1. SLVN

The third factor is substantively meaningless and is not considered.

EIGENVALUES FOR SAMPLE CORRELATION MATRIX

1 2 3 4 5

________ ________ ________ ________ ________

4.717 1.418 1.050 0.752 0.729

GEOMIN ROTATED LOADINGS (* significant at 5% level)

1 2

________ ________

EURO1 0.951* -0.013

EURO2 0.040 0.555*

EURO3 0.361* 0.508*

EURO4 0.345* 0.135*

EURO5 0.296* 0.277*

EURO6 -0.005 0.679*

EURO7 0.498* 0.146*

EURO8 0.170* 0.432*

EURO9 0.295* 0.497*

EURO10 0.000 0.661*

EURO11 -0.149* 0.745*

EURO12 0.710* 0.013

- 1. EST

EIGENVALUES FOR SAMPLE CORRELATION MATRIX

1 2 3 4 5

________ ________ ________ ________ ________

4.345 1.598 0.876 0.827 0.745

GEOMIN ROTATED LOADINGS (* significant at 5% level)

1 2

________ ________

EURO1 0.786* -0.005

EURO2 -0.008 0.731*

EURO3 0.461* 0.451*

EURO4 0.418* -0.018

EURO5 0.467* 0.187*

EURO6 0.310* 0.560*

EURO7 0.548* 0.050

EURO8 0.349* 0.368*

EURO9 0.404* 0.277*

EURO10 0.240* 0.500*

EURO11 -0.033 0.683*

EURO12 0.690* -0.068

- 1. HR

EIGENVALUES FOR SAMPLE CORRELATION MATRIX

1 2 3 4 5

________ ________ ________ ________ ________

5.339 1.611 0.873 0.715 0.631

GEOMIN ROTATED LOADINGS (* significant at 5% level)

1 2

________ ________

EURO1 0.915* -0.017

EURO2 -0.012 0.706*

EURO3 0.525* 0.470*

EURO4 0.509* 0.126

EURO5 0.571* 0.144*

EURO6 0.347* 0.604*

EURO7 0.718* -0.084

EURO8 0.387* 0.338*

EURO9 0.557* 0.317*

EURO10 0.216* 0.479*

EURO11 -0.008 0.721*

EURO12 0.731* 0.002

Count of items that violated the retention/deletion criteria across 18 countries:

| Item | Total number of deletions | % |
| --- | --- | --- |
| EURO1 | 0 | 0.0 |
| EURO2 | 2 | 0.11 |
| EURO3 | 9 | 0.5 |
| EURO4 | 4 | 0.22 |
| EURO5 | 5 | 0.28 |
| EURO6 | 2 | 0.11 |
| EURO7 | 3 | 0.17 |
| EURO8 | 5 | 0.28 |
| EURO9 | 6 | 0.33 |
| EURO10 | 3 | 0.17 |
| EURO11 | 0 | 0.0 |
| EURO12 | 0 | 0.0 |

We decided to keep items for which a violation was observed in less than 25 % of the countries. Keeping items with a rate higher than 25 % is expected to decrease the validity of our findings across countries. Thus, items EURO3, EURO5, EURO8, and EURO9 could not be considered for further analysis because they are not clearly reflecting either the first or the second factor in at least five countries.

1. Confirmatory factor analysis (CFA) per country

We inspect if (1) models fit the data, (2) standardized loadings are ≥ 0.32, and (3) factor correlations are < 0.80.

- 1. AT

MODEL FIT INFORMATION

Number of Free Parameters 17

Chi-Square Test of Model Fit

Value 46.495*

Degrees of Freedom 19

P-Value 0.0004

* The chi-square value for MLM, MLMV, MLR, ULSMV, WLSM and WLSMV cannot be used

for chi-square difference testing in the regular way. MLM, MLR and WLSM

chi-square difference testing is described on the Mplus website. MLMV, WLSMV,

and ULSMV difference testing is done using the DIFFTEST option.

RMSEA (Root Mean Square Error Of Approximation)

Estimate 0.026

90 Percent C.I. 0.016 0.035

Probability RMSEA <= .05 1.000

CFI/TLI

CFI 0.980

TLI 0.970

Chi-Square Test of Model Fit for the Baseline Model

Value 1391.000

Degrees of Freedom 28

P-Value 0.0000

SRMR (Standardized Root Mean Square Residual)

Value 0.048

Optimum Function Value for Weighted Least-Squares Estimator

Value 0.84101736D-02

MODEL RESULTS

Two-Tailed

Estimate S.E. Est./S.E. P-Value

F1 BY

EURO1 1.000 0.000 999.000 999.000

EURO4 0.495 0.056 8.830 0.000

EURO7 0.444 0.044 10.122 0.000

EURO12 0.608 0.051 11.876 0.000

F2 BY

EURO2 1.000 0.000 999.000 999.000

EURO6 1.551 0.173 8.970 0.000

EURO10 1.120 0.123 9.073 0.000

EURO11 0.543 0.089 6.131 0.000

F2 WITH

F1 0.307 0.035 8.790 0.000

Thresholds

EURO1$1 0.246 0.027 9.156 0.000

EURO2$1 1.422 0.039 36.379 0.000

EURO4$1 1.595 0.043 36.762 0.000

EURO6$1 1.512 0.041 36.704 0.000

EURO7$1 0.896 0.031 29.039 0.000

EURO10$1 1.101 0.033 33.002 0.000

EURO11$1 1.033 0.032 31.842 0.000

EURO12$1 0.713 0.029 24.418 0.000

Variances

F1 0.968 0.078 12.485 0.000

F2 0.320 0.058 5.469 0.000

STANDARDIZED MODEL RESULTS

STDYX Standardization

Two-Tailed

Estimate S.E. Est./S.E. P-Value

F1 BY

EURO1 0.984 0.039 24.969 0.000

EURO4 0.487 0.048 10.168 0.000

EURO7 0.437 0.035 12.485 0.000

EURO12 0.599 0.033 18.218 0.000

F2 BY

EURO2 0.565 0.052 10.938 0.000

EURO6 0.877 0.051 17.276 0.000

EURO10 0.633 0.043 14.787 0.000

EURO11 0.307 0.048 6.435 0.000

F2 WITH

F1 0.551 0.041 13.542 0.000

- 1. DE

MODEL FIT INFORMATION

Number of Free Parameters 17

Chi-Square Test of Model Fit

Value 30.995*

Degrees of Freedom 19

P-Value 0.0404

* The chi-square value for MLM, MLMV, MLR, ULSMV, WLSM and WLSMV cannot be used

for chi-square difference testing in the regular way. MLM, MLR and WLSM

chi-square difference testing is described on the Mplus website. MLMV, WLSMV,

and ULSMV difference testing is done using the DIFFTEST option.

RMSEA (Root Mean Square Error Of Approximation)

Estimate 0.015

90 Percent C.I. 0.003 0.024

Probability RMSEA <= .05 1.000

CFI/TLI

CFI 0.993

TLI 0.990

Chi-Square Test of Model Fit for the Baseline Model

Value 1834.236

Degrees of Freedom 28

P-Value 0.0000

SRMR (Standardized Root Mean Square Residual)

Value 0.031

Optimum Function Value for Weighted Least-Squares Estimator

Value 0.40750155D-02

MODEL RESULTS

Two-Tailed

Estimate S.E. Est./S.E. P-Value

F1 BY

EURO1 1.000 0.000 999.000 999.000

EURO4 0.581 0.055 10.640 0.000

EURO7 0.526 0.039 13.512 0.000

EURO12 0.795 0.050 15.762 0.000

F2 BY

EURO2 1.000 0.000 999.000 999.000

EURO6 1.455 0.174 8.340 0.000

EURO10 1.093 0.126 8.644 0.000

EURO11 0.693 0.109 6.335 0.000

F2 WITH

F1 0.281 0.031 8.934 0.000

Thresholds

EURO1$1 0.047 0.023 1.998 0.046

EURO2$1 1.499 0.036 41.666 0.000

EURO4$1 1.491 0.036 41.627 0.000

EURO6$1 1.653 0.040 41.663 0.000

EURO7$1 0.534 0.025 21.637 0.000

EURO10$1 1.017 0.028 35.813 0.000

EURO11$1 1.267 0.032 39.987 0.000

EURO12$1 0.715 0.026 27.815 0.000

Variances

F1 0.793 0.051 15.423 0.000

F2 0.297 0.055 5.358 0.000

STANDARDIZED MODEL RESULTS

STDYX Standardization

Two-Tailed

Estimate S.E. Est./S.E. P-Value

F1 BY

EURO1 0.891 0.029 30.845 0.000

EURO4 0.517 0.043 12.104 0.000

EURO7 0.469 0.028 16.468 0.000

EURO12 0.708 0.028 25.140 0.000

F2 BY

EURO2 0.545 0.051 10.717 0.000

EURO6 0.793 0.054 14.793 0.000

EURO10 0.596 0.040 14.739 0.000

EURO11 0.378 0.049 7.761 0.000

F2 WITH

F1 0.579 0.041 14.190 0.000

- 1. SE

MODEL FIT INFORMATION

Number of Free Parameters 17

Chi-Square Test of Model Fit

Value 68.490*

Degrees of Freedom 19

P-Value 0.0000

* The chi-square value for MLM, MLMV, MLR, ULSMV, WLSM and WLSMV cannot be used

for chi-square difference testing in the regular way. MLM, MLR and WLSM

chi-square difference testing is described on the Mplus website. MLMV, WLSMV,

and ULSMV difference testing is done using the DIFFTEST option.

RMSEA (Root Mean Square Error Of Approximation)

Estimate 0.031

90 Percent C.I. 0.023 0.039

Probability RMSEA <= .05 1.000

CFI/TLI

CFI 0.960

TLI 0.942

Chi-Square Test of Model Fit for the Baseline Model

Value 1275.854

Degrees of Freedom 28

P-Value 0.0000

SRMR (Standardized Root Mean Square Residual)

Value 0.049

Optimum Function Value for Weighted Least-Squares Estimator

Value 0.10246956D-01

MODEL RESULTS

Two-Tailed

Estimate S.E. Est./S.E. P-Value

F1 BY

EURO1 1.000 0.000 999.000 999.000

EURO4 0.409 0.052 7.808 0.000

EURO7 0.473 0.046 10.286 0.000

EURO12 0.635 0.056 11.281 0.000

F2 BY

EURO2 1.000 0.000 999.000 999.000

EURO6 1.507 0.228 6.609 0.000

EURO10 1.240 0.188 6.598 0.000

EURO11 0.658 0.130 5.069 0.000

F2 WITH

F1 0.224 0.032 7.068 0.000

Thresholds

EURO1$1 0.439 0.025 17.608 0.000

EURO2$1 1.460 0.036 40.436 0.000

EURO4$1 1.423 0.035 40.209 0.000

EURO6$1 1.452 0.036 40.394 0.000

EURO7$1 0.886 0.028 31.872 0.000

EURO10$1 1.174 0.031 37.696 0.000

EURO11$1 1.161 0.031 37.492 0.000

EURO12$1 0.737 0.027 27.735 0.000

Variances

F1 0.915 0.078 11.771 0.000

F2 0.222 0.053 4.162 0.000

STANDARDIZED MODEL RESULTS

STDYX Standardization

Two-Tailed

Estimate S.E. Est./S.E. P-Value

F1 BY

EURO1 0.957 0.041 23.541 0.000

EURO4 0.391 0.044 8.955 0.000

EURO7 0.453 0.033 13.566 0.000

EURO12 0.608 0.033 18.217 0.000

F2 BY

EURO2 0.471 0.057 8.324 0.000

EURO6 0.710 0.058 12.140 0.000

EURO10 0.584 0.051 11.361 0.000

EURO11 0.310 0.052 5.991 0.000

F2 WITH

F1 0.496 0.046 10.776 0.000

- 1. ES

MODEL FIT INFORMATION

Number of Free Parameters 17

Chi-Square Test of Model Fit

Value 153.628*

Degrees of Freedom 19

P-Value 0.0000

* The chi-square value for MLM, MLMV, MLR, ULSMV, WLSM and WLSMV cannot be used

for chi-square difference testing in the regular way. MLM, MLR and WLSM

chi-square difference testing is described on the Mplus website. MLMV, WLSMV,

and ULSMV difference testing is done using the DIFFTEST option.

RMSEA (Root Mean Square Error Of Approximation)

Estimate 0.047

90 Percent C.I. 0.040 0.054

Probability RMSEA <= .05 0.757

CFI/TLI

CFI 0.982

TLI 0.973

Chi-Square Test of Model Fit for the Baseline Model

Value 7451.023

Degrees of Freedom 28

P-Value 0.0000

SRMR (Standardized Root Mean Square Residual)

Value 0.045

Optimum Function Value for Weighted Least-Squares Estimator

Value 0.17268005D-01

MODEL RESULTS

Two-Tailed

Estimate S.E. Est./S.E. P-Value

F1 BY

EURO1 1.000 0.000 999.000 999.000

EURO4 0.581 0.036 16.161 0.000

EURO7 0.696 0.027 25.495 0.000

EURO12 0.775 0.028 28.024 0.000

F2 BY

EURO2 1.000 0.000 999.000 999.000

EURO6 1.386 0.056 24.660 0.000

EURO10 1.101 0.052 21.303 0.000

EURO11 1.213 0.053 22.788 0.000

F2 WITH

F1 0.447 0.020 22.179 0.000

Thresholds

EURO1$1 0.361 0.023 15.956 0.000

EURO2$1 0.626 0.024 26.345 0.000

EURO4$1 1.656 0.038 44.109 0.000

EURO6$1 1.031 0.027 38.266 0.000

EURO7$1 0.788 0.025 31.792 0.000

EURO10$1 0.764 0.025 31.010 0.000

EURO11$1 1.048 0.027 38.643 0.000

EURO12$1 0.617 0.024 26.030 0.000

Variances

F1 0.925 0.033 27.993 0.000

F2 0.410 0.028 14.400 0.000

STANDARDIZED MODEL RESULTS

STDYX Standardization

Two-Tailed

Estimate S.E. Est./S.E. P-Value

F1 BY

EURO1 0.962 0.017 55.987 0.000

EURO4 0.558 0.032 17.285 0.000

EURO7 0.669 0.021 31.361 0.000

EURO12 0.745 0.019 39.735 0.000

F2 BY

EURO2 0.640 0.022 28.799 0.000

EURO6 0.887 0.018 48.104 0.000

EURO10 0.705 0.022 32.024 0.000

EURO11 0.777 0.021 36.618 0.000

F2 WITH

F1 0.727 0.019 37.978 0.000

- 1. IT

MODEL FIT INFORMATION

Number of Free Parameters 17

Chi-Square Test of Model Fit

Value 94.194*

Degrees of Freedom 19

P-Value 0.0000

* The chi-square value for MLM, MLMV, MLR, ULSMV, WLSM and WLSMV cannot be used

for chi-square difference testing in the regular way. MLM, MLR and WLSM

chi-square difference testing is described on the Mplus website. MLMV, WLSMV,

and ULSMV difference testing is done using the DIFFTEST option.

RMSEA (Root Mean Square Error Of Approximation)

Estimate 0.035

90 Percent C.I. 0.028 0.043

Probability RMSEA <= .05 1.000

CFI/TLI

CFI 0.985

TLI 0.979

Chi-Square Test of Model Fit for the Baseline Model

Value 5210.196

Degrees of Freedom 28

P-Value 0.0000

SRMR (Standardized Root Mean Square Residual)

Value 0.038

Optimum Function Value for Weighted Least-Squares Estimator

Value 0.10018111D-01

MODEL RESULTS

Two-Tailed

Estimate S.E. Est./S.E. P-Value

F1 BY

EURO1 1.000 0.000 999.000 999.000

EURO4 0.643 0.041 15.650 0.000

EURO7 0.609 0.032 19.263 0.000

EURO12 0.906 0.035 25.741 0.000

F2 BY

EURO2 1.000 0.000 999.000 999.000

EURO6 1.653 0.094 17.634 0.000

EURO10 1.296 0.077 16.940 0.000

EURO11 1.321 0.076 17.410 0.000

F2 WITH

F1 0.335 0.021 15.909 0.000

Thresholds

EURO1$1 0.250 0.022 11.097 0.000

EURO2$1 0.836 0.025 33.040 0.000

EURO4$1 1.323 0.031 42.705 0.000

EURO6$1 1.024 0.027 37.857 0.000

EURO7$1 0.163 0.022 7.272 0.000

EURO10$1 0.604 0.024 25.416 0.000

EURO11$1 0.764 0.025 30.838 0.000

EURO12$1 0.624 0.024 26.104 0.000

Variances

F1 0.741 0.033 22.193 0.000

F2 0.280 0.029 9.714 0.000

STANDARDIZED MODEL RESULTS

STDYX Standardization

Two-Tailed

Estimate S.E. Est./S.E. P-Value

F1 BY

EURO1 0.861 0.019 44.387 0.000

EURO4 0.554 0.032 17.291 0.000

EURO7 0.524 0.024 22.199 0.000

EURO12 0.780 0.020 39.222 0.000

F2 BY

EURO2 0.529 0.027 19.428 0.000

EURO6 0.875 0.022 40.247 0.000

EURO10 0.686 0.022 31.359 0.000

EURO11 0.699 0.022 31.415 0.000

F2 WITH

F1 0.734 0.021 34.435 0.000

- 1. FR

MODEL FIT INFORMATION

Number of Free Parameters 17

Chi-Square Test of Model Fit

Value 88.974*

Degrees of Freedom 19

P-Value 0.0000

* The chi-square value for MLM, MLMV, MLR, ULSMV, WLSM and WLSMV cannot be used

for chi-square difference testing in the regular way. MLM, MLR and WLSM

chi-square difference testing is described on the Mplus website. MLMV, WLSMV,

and ULSMV difference testing is done using the DIFFTEST option.

RMSEA (Root Mean Square Error Of Approximation)

Estimate 0.037

90 Percent C.I. 0.029 0.045

Probability RMSEA <= .05 0.997

CFI/TLI

CFI 0.967

TLI 0.951

Chi-Square Test of Model Fit for the Baseline Model

Value 2131.621

Degrees of Freedom 28

P-Value 0.0000

SRMR (Standardized Root Mean Square Residual)

Value 0.051

Optimum Function Value for Weighted Least-Squares Estimator

Value 0.13345019D-01

MODEL RESULTS

Two-Tailed

Estimate S.E. Est./S.E. P-Value

F1 BY

EURO1 1.000 0.000 999.000 999.000

EURO4 0.687 0.048 14.364 0.000

EURO7 0.469 0.038 12.275 0.000

EURO12 0.832 0.051 16.207 0.000

F2 BY

EURO2 1.000 0.000 999.000 999.000

EURO6 1.227 0.122 10.024 0.000

EURO10 0.963 0.094 10.282 0.000

EURO11 0.760 0.091 8.361 0.000

F2 WITH

F1 0.247 0.023 10.689 0.000

Thresholds

EURO1$1 -0.005 0.024 -0.193 0.847

EURO2$1 0.650 0.026 24.890 0.000

EURO4$1 1.276 0.033 38.833 0.000

EURO6$1 1.413 0.035 39.992 0.000

EURO7$1 0.430 0.025 17.196 0.000

EURO10$1 0.803 0.027 29.480 0.000

EURO11$1 1.107 0.030 36.435 0.000

EURO12$1 0.578 0.026 22.505 0.000

Variances

F1 0.779 0.050 15.462 0.000

F2 0.332 0.043 7.737 0.000

STANDARDIZED MODEL RESULTS

STDYX Standardization

Two-Tailed

Estimate S.E. Est./S.E. P-Value

F1 BY

EURO1 0.882 0.029 30.923 0.000

EURO4 0.606 0.034 17.577 0.000

EURO7 0.414 0.029 14.283 0.000

EURO12 0.734 0.028 26.643 0.000

F2 BY

EURO2 0.577 0.037 15.475 0.000

EURO6 0.707 0.048 14.648 0.000

EURO10 0.555 0.038 14.595 0.000

EURO11 0.438 0.043 10.244 0.000

F2 WITH

F1 0.485 0.036 13.536 0.000

- 1. DK

MODEL FIT INFORMATION

Number of Free Parameters 17

Chi-Square Test of Model Fit

Value 99.095*

Degrees of Freedom 19

P-Value 0.0000

* The chi-square value for MLM, MLMV, MLR, ULSMV, WLSM and WLSMV cannot be used

for chi-square difference testing in the regular way. MLM, MLR and WLSM

chi-square difference testing is described on the Mplus website. MLMV, WLSMV,

and ULSMV difference testing is done using the DIFFTEST option.

RMSEA (Root Mean Square Error Of Approximation)

Estimate 0.041

90 Percent C.I. 0.033 0.049

Probability RMSEA <= .05 0.973

CFI/TLI

CFI 0.956

TLI 0.935

Chi-Square Test of Model Fit for the Baseline Model

Value 1845.166

Degrees of Freedom 28

P-Value 0.0000

SRMR (Standardized Root Mean Square Residual)

Value 0.066

Optimum Function Value for Weighted Least-Squares Estimator

Value 0.14065836D-01

MODEL RESULTS

Two-Tailed

Estimate S.E. Est./S.E. P-Value

F1 BY

EURO1 1.000 0.000 999.000 999.000

EURO4 0.695 0.047 14.735 0.000

EURO7 0.639 0.040 15.855 0.000

EURO12 0.796 0.047 17.081 0.000

F2 BY

EURO2 1.000 0.000 999.000 999.000

EURO6 4.305 1.677 2.567 0.010

EURO10 3.805 1.474 2.582 0.010

EURO11 1.786 0.722 2.474 0.013

F2 WITH

F1 0.103 0.040 2.572 0.010

Thresholds

EURO1$1 0.479 0.026 18.514 0.000

EURO2$1 1.604 0.041 39.413 0.000

EURO4$1 1.290 0.034 37.987 0.000

EURO6$1 1.640 0.042 39.363 0.000

EURO7$1 0.804 0.028 28.776 0.000

EURO10$1 1.181 0.032 36.620 0.000

EURO11$1 1.536 0.039 39.369 0.000

EURO12$1 0.953 0.029 32.481 0.000

Variances

F1 0.797 0.045 17.667 0.000

F2 0.033 0.025 1.284 0.199

STANDARDIZED MODEL RESULTS

STDYX Standardization

Two-Tailed

Estimate S.E. Est./S.E. P-Value

F1 BY

EURO1 0.893 0.025 35.333 0.000

EURO4 0.620 0.035 17.529 0.000

EURO7 0.570 0.030 19.228 0.000

EURO12 0.711 0.029 24.907 0.000

F2 BY

EURO2 0.181 0.070 2.569 0.010

EURO6 0.778 0.056 13.787 0.000

EURO10 0.688 0.048 14.394 0.000

EURO11 0.323 0.061 5.303 0.000

F2 WITH

F1 0.641 0.048 13.307 0.000

- 1. GR

MODEL FIT INFORMATION

Number of Free Parameters 17

Chi-Square Test of Model Fit

Value 67.244*

Degrees of Freedom 19

P-Value 0.0000

* The chi-square value for MLM, MLMV, MLR, ULSMV, WLSM and WLSMV cannot be used

for chi-square difference testing in the regular way. MLM, MLR and WLSM

chi-square difference testing is described on the Mplus website. MLMV, WLSMV,

and ULSMV difference testing is done using the DIFFTEST option.

RMSEA (Root Mean Square Error Of Approximation)

Estimate 0.028

90 Percent C.I. 0.021 0.036

Probability RMSEA <= .05 1.000

CFI/TLI

CFI 0.990

TLI 0.985

Chi-Square Test of Model Fit for the Baseline Model

Value 4772.518

Degrees of Freedom 28

P-Value 0.0000

SRMR (Standardized Root Mean Square Residual)

Value 0.039

Optimum Function Value for Weighted Least-Squares Estimator

Value 0.76992245D-02

MODEL RESULTS

Two-Tailed

Estimate S.E. Est./S.E. P-Value

F1 BY

EURO1 1.000 0.000 999.000 999.000

EURO4 0.471 0.040 11.846 0.000

EURO7 0.431 0.031 13.823 0.000

EURO12 0.733 0.033 22.083 0.000

F2 BY

EURO2 1.000 0.000 999.000 999.000

EURO6 0.952 0.044 21.652 0.000

EURO10 0.857 0.043 19.701 0.000

EURO11 1.124 0.047 23.835 0.000

F2 WITH

F1 0.477 0.021 22.854 0.000

Thresholds

EURO1$1 0.268 0.023 11.870 0.000

EURO2$1 0.601 0.024 25.239 0.000

EURO4$1 1.466 0.034 43.672 0.000

EURO6$1 0.880 0.026 34.219 0.000

EURO7$1 0.744 0.025 30.183 0.000

EURO10$1 0.661 0.024 27.391 0.000

EURO11$1 0.851 0.025 33.435 0.000

EURO12$1 0.508 0.023 21.746 0.000

Variances

F1 0.896 0.041 21.976 0.000

F2 0.506 0.031 16.476 0.000

STANDARDIZED MODEL RESULTS

STDYX Standardization

Two-Tailed

Estimate S.E. Est./S.E. P-Value

F1 BY

EURO1 0.947 0.022 43.951 0.000

EURO4 0.446 0.035 12.614 0.000

EURO7 0.408 0.027 15.019 0.000

EURO12 0.693 0.022 31.900 0.000

F2 BY

EURO2 0.711 0.022 32.951 0.000

EURO6 0.677 0.024 27.656 0.000

EURO10 0.609 0.024 24.974 0.000

EURO11 0.800 0.021 37.466 0.000

F2 WITH

F1 0.709 0.022 31.593 0.000

- 1. CH

MODEL FIT INFORMATION

Number of Free Parameters 17

Chi-Square Test of Model Fit

Value 47.942*

Degrees of Freedom 19

P-Value 0.0003

* The chi-square value for MLM, MLMV, MLR, ULSMV, WLSM and WLSMV cannot be used

for chi-square difference testing in the regular way. MLM, MLR and WLSM

chi-square difference testing is described on the Mplus website. MLMV, WLSMV,

and ULSMV difference testing is done using the DIFFTEST option.

RMSEA (Root Mean Square Error Of Approximation)

Estimate 0.028

90 Percent C.I. 0.018 0.038

Probability RMSEA <= .05 1.000

CFI/TLI

CFI 0.959

TLI 0.939

Chi-Square Test of Model Fit for the Baseline Model

Value 728.535

Degrees of Freedom 28

P-Value 0.0000

SRMR (Standardized Root Mean Square Residual)

Value 0.060

Optimum Function Value for Weighted Least-Squares Estimator

Value 0.10436031D-01

MODEL RESULTS

Two-Tailed

Estimate S.E. Est./S.E. P-Value

F1 BY

EURO1 1.000 0.000 999.000 999.000

EURO4 0.591 0.086 6.898 0.000

EURO7 0.524 0.061 8.583 0.000

EURO12 0.832 0.088 9.453 0.000

F2 BY

EURO2 1.000 0.000 999.000 999.000

EURO6 1.584 0.461 3.436 0.001

EURO10 1.706 0.455 3.752 0.000

EURO11 0.968 0.301 3.219 0.001

F2 WITH

F1 0.109 0.031 3.563 0.000

Thresholds

EURO1$1 0.275 0.029 9.647 0.000

EURO2$1 1.393 0.041 34.195 0.000

EURO4$1 1.660 0.048 34.618 0.000

EURO6$1 1.795 0.053 34.018 0.000

EURO7$1 0.682 0.031 22.247 0.000

EURO10$1 1.253 0.038 33.072 0.000

EURO11$1 1.603 0.046 34.723 0.000

EURO12$1 0.817 0.032 25.662 0.000

Variances

F1 0.692 0.078 8.888 0.000

F2 0.143 0.059 2.421 0.015

STANDARDIZED MODEL RESULTS

STDYX Standardization

Two-Tailed

Estimate S.E. Est./S.E. P-Value

F1 BY

EURO1 0.832 0.047 17.775 0.000

EURO4 0.492 0.061 7.997 0.000

EURO7 0.436 0.038 11.397 0.000

EURO12 0.692 0.042 16.410 0.000

F2 BY

EURO2 0.378 0.078 4.843 0.000

EURO6 0.599 0.101 5.925 0.000

EURO10 0.645 0.086 7.481 0.000

EURO11 0.366 0.084 4.360 0.000

F2 WITH

F1 0.346 0.063 5.504 0.000

- 1. BE

MODEL FIT INFORMATION

Number of Free Parameters 17

Chi-Square Test of Model Fit

Value 158.600*

Degrees of Freedom 19

P-Value 0.0000

* The chi-square value for MLM, MLMV, MLR, ULSMV, WLSM and WLSMV cannot be used

for chi-square difference testing in the regular way. MLM, MLR and WLSM

chi-square difference testing is described on the Mplus website. MLMV, WLSMV,

and ULSMV difference testing is done using the DIFFTEST option.

RMSEA (Root Mean Square Error Of Approximation)

Estimate 0.042

90 Percent C.I. 0.036 0.048

Probability RMSEA <= .05 0.981

CFI/TLI

CFI 0.954

TLI 0.933

Chi-Square Test of Model Fit for the Baseline Model

Value 3089.104

Degrees of Freedom 28

P-Value 0.0000

SRMR (Standardized Root Mean Square Residual)

Value 0.056

Optimum Function Value for Weighted Least-Squares Estimator

Value 0.15664931D-01

MODEL RESULTS

Two-Tailed

Estimate S.E. Est./S.E. P-Value

F1 BY

EURO1 1.000 0.000 999.000 999.000

EURO4 0.574 0.035 16.398 0.000

EURO7 0.519 0.031 16.851 0.000

EURO12 0.674 0.037 18.411 0.000

F2 BY

EURO2 1.000 0.000 999.000 999.000

EURO6 1.834 0.193 9.523 0.000

EURO10 1.195 0.131 9.104 0.000

EURO11 1.330 0.149 8.901 0.000

F2 WITH

F1 0.214 0.022 9.882 0.000

Thresholds

EURO1$1 0.166 0.020 8.455 0.000

EURO2$1 0.998 0.024 42.457 0.000

EURO4$1 1.311 0.027 48.483 0.000

EURO6$1 1.393 0.028 49.341 0.000

EURO7$1 0.576 0.021 27.745 0.000

EURO10$1 0.792 0.022 36.101 0.000

EURO11$1 1.471 0.030 49.841 0.000

EURO12$1 0.443 0.020 21.871 0.000

Variances

F1 0.892 0.047 18.812 0.000

F2 0.170 0.029 5.892 0.000

STANDARDIZED MODEL RESULTS

STDYX Standardization

Two-Tailed

Estimate S.E. Est./S.E. P-Value

F1 BY

EURO1 0.944 0.025 37.625 0.000

EURO4 0.542 0.027 20.056 0.000

EURO7 0.490 0.023 21.312 0.000

EURO12 0.636 0.022 28.775 0.000

F2 BY

EURO2 0.412 0.035 11.784 0.000

EURO6 0.755 0.042 18.183 0.000

EURO10 0.492 0.033 14.981 0.000

EURO11 0.548 0.040 13.688 0.000

F2 WITH

F1 0.550 0.032 16.952 0.000

- 1. ISR

MODEL FIT INFORMATION

Number of Free Parameters 17

Chi-Square Test of Model Fit

Value 43.572*

Degrees of Freedom 19

P-Value 0.0011

* The chi-square value for MLM, MLMV, MLR, ULSMV, WLSM and WLSMV cannot be used

for chi-square difference testing in the regular way. MLM, MLR and WLSM

chi-square difference testing is described on the Mplus website. MLMV, WLSMV,

and ULSMV difference testing is done using the DIFFTEST option.

RMSEA (Root Mean Square Error Of Approximation)

Estimate 0.032

90 Percent C.I. 0.020 0.045

Probability RMSEA <= .05 0.991

CFI/TLI

CFI 0.986

TLI 0.979

Chi-Square Test of Model Fit for the Baseline Model

Value 1755.072

Degrees of Freedom 28

P-Value 0.0000

SRMR (Standardized Root Mean Square Residual)

Value 0.050

Optimum Function Value for Weighted Least-Squares Estimator

Value 0.12853166D-01

MODEL RESULTS

Two-Tailed

Estimate S.E. Est./S.E. P-Value

F1 BY

EURO1 1.000 0.000 999.000 999.000

EURO4 0.629 0.060 10.412 0.000

EURO7 0.625 0.048 13.097 0.000

EURO12 0.811 0.054 14.946 0.000

F2 BY

EURO2 1.000 0.000 999.000 999.000

EURO6 1.823 0.237 7.702 0.000

EURO10 1.900 0.247 7.691 0.000

EURO11 1.748 0.226 7.742 0.000

F2 WITH

F1 0.226 0.033 6.959 0.000

Thresholds

EURO1$1 0.352 0.036 9.676 0.000

EURO2$1 0.761 0.040 19.257 0.000

EURO4$1 1.456 0.053 27.285 0.000

EURO6$1 1.188 0.046 25.628 0.000

EURO7$1 0.372 0.036 10.215 0.000

EURO10$1 0.745 0.039 18.936 0.000

EURO11$1 1.004 0.043 23.408 0.000

EURO12$1 0.755 0.039 19.111 0.000

Variances

F1 0.866 0.058 14.866 0.000

F2 0.173 0.041 4.212 0.000

STANDARDIZED MODEL RESULTS

STDYX Standardization

Two-Tailed

Estimate S.E. Est./S.E. P-Value

F1 BY

EURO1 0.931 0.031 29.732 0.000

EURO4 0.585 0.050 11.697 0.000

EURO7 0.582 0.037 15.653 0.000

EURO12 0.755 0.034 22.104 0.000

F2 BY

EURO2 0.416 0.049 8.424 0.000

EURO6 0.759 0.044 17.176 0.000

EURO10 0.791 0.038 21.007 0.000

EURO11 0.727 0.042 17.397 0.000

F2 WITH

F1 0.584 0.042 13.797 0.000

- 1. CZ

MODEL FIT INFORMATION

Number of Free Parameters 17

Chi-Square Test of Model Fit

Value 44.022*

Degrees of Freedom 19

P-Value 0.0009

* The chi-square value for MLM, MLMV, MLR, ULSMV, WLSM and WLSMV cannot be used

for chi-square difference testing in the regular way. MLM, MLR and WLSM

chi-square difference testing is described on the Mplus website. MLMV, WLSMV,

and ULSMV difference testing is done using the DIFFTEST option.

RMSEA (Root Mean Square Error Of Approximation)

Estimate 0.020

90 Percent C.I. 0.012 0.028

Probability RMSEA <= .05 1.000

CFI/TLI

CFI 0.989

TLI 0.983

Chi-Square Test of Model Fit for the Baseline Model

Value 2238.990

Degrees of Freedom 28

P-Value 0.0000

SRMR (Standardized Root Mean Square Residual)

Value 0.035

Optimum Function Value for Weighted Least-Squares Estimator

Value 0.51260205D-02

MODEL RESULTS

Two-Tailed

Estimate S.E. Est./S.E. P-Value

F1 BY

EURO1 1.000 0.000 999.000 999.000

EURO4 0.488 0.050 9.767 0.000

EURO7 0.701 0.043 16.309 0.000

EURO12 0.728 0.044 16.558 0.000

F2 BY

EURO2 1.000 0.000 999.000 999.000

EURO6 1.822 0.173 10.505 0.000

EURO10 1.391 0.135 10.315 0.000

EURO11 1.659 0.162 10.217 0.000

F2 WITH

F1 0.222 0.022 10.002 0.000

Thresholds

EURO1$1 0.191 0.022 8.554 0.000

EURO2$1 0.865 0.026 33.874 0.000

EURO4$1 1.461 0.033 43.748 0.000

EURO6$1 1.569 0.036 44.027 0.000

EURO7$1 0.771 0.025 31.106 0.000

EURO10$1 1.138 0.028 40.173 0.000

EURO11$1 1.719 0.039 43.573 0.000

EURO12$1 0.708 0.024 29.083 0.000

Variances

F1 0.774 0.047 16.608 0.000

F2 0.206 0.032 6.407 0.000

STANDARDIZED MODEL RESULTS

STDYX Standardization

Two-Tailed

Estimate S.E. Est./S.E. P-Value

F1 BY

EURO1 0.880 0.026 33.216 0.000

EURO4 0.429 0.040 10.622 0.000

EURO7 0.617 0.027 22.575 0.000

EURO12 0.640 0.027 24.073 0.000

F2 BY

EURO2 0.454 0.035 12.814 0.000

EURO6 0.827 0.040 20.436 0.000

EURO10 0.631 0.036 17.661 0.000

EURO11 0.753 0.046 16.249 0.000

F2 WITH

F1 0.556 0.034 16.455 0.000

- 1. PL

MODEL FIT INFORMATION

Number of Free Parameters 17

Chi-Square Test of Model Fit

Value 87.552*

Degrees of Freedom 19

P-Value 0.0000

* The chi-square value for MLM, MLMV, MLR, ULSMV, WLSM and WLSMV cannot be used

for chi-square difference testing in the regular way. MLM, MLR and WLSM

chi-square difference testing is described on the Mplus website. MLMV, WLSMV,

and ULSMV difference testing is done using the DIFFTEST option.

RMSEA (Root Mean Square Error Of Approximation)

Estimate 0.056

90 Percent C.I. 0.044 0.068

Probability RMSEA <= .05 0.195

CFI/TLI

CFI 0.949

TLI 0.925

Chi-Square Test of Model Fit for the Baseline Model

Value 1366.729

Degrees of Freedom 28

P-Value 0.0000

SRMR (Standardized Root Mean Square Residual)

Value 0.062

Optimum Function Value for Weighted Least-Squares Estimator

Value 0.29357837D-01

MODEL RESULTS

Two-Tailed

Estimate S.E. Est./S.E. P-Value

F1 BY

EURO1 1.000 0.000 999.000 999.000

EURO4 0.630 0.067 9.412 0.000

EURO7 0.734 0.053 13.943 0.000

EURO12 0.906 0.061 14.940 0.000

F2 BY

EURO2 1.000 0.000 999.000 999.000

EURO6 1.476 0.223 6.613 0.000

EURO10 1.773 0.246 7.219 0.000

EURO11 1.117 0.170 6.573 0.000

F2 WITH

F1 0.198 0.029 6.894 0.000

Thresholds

EURO1$1 -0.151 0.037 -4.082 0.000

EURO2$1 0.364 0.038 9.650 0.000

EURO4$1 1.238 0.049 25.190 0.000

EURO6$1 1.180 0.048 24.669 0.000

EURO7$1 0.235 0.037 6.310 0.000

EURO10$1 0.768 0.041 18.668 0.000

EURO11$1 0.578 0.039 14.746 0.000

EURO12$1 0.724 0.041 17.840 0.000

Variances

F1 0.780 0.058 13.351 0.000

F2 0.186 0.042 4.368 0.000

STANDARDIZED MODEL RESULTS

STDYX Standardization

Two-Tailed

Estimate S.E. Est./S.E. P-Value

F1 BY

EURO1 0.883 0.033 26.703 0.000

EURO4 0.556 0.053 10.429 0.000

EURO7 0.648 0.035 18.603 0.000

EURO12 0.801 0.035 22.977 0.000

F2 BY

EURO2 0.431 0.049 8.737 0.000

EURO6 0.636 0.063 10.165 0.000

EURO10 0.764 0.052 14.577 0.000

EURO11 0.481 0.050 9.693 0.000

F2 WITH

F1 0.521 0.045 11.641 0.000

- 1. LUX

MODEL FIT INFORMATION

Number of Free Parameters 17

Chi-Square Test of Model Fit

Value 39.830*

Degrees of Freedom 19

P-Value 0.0034

* The chi-square value for MLM, MLMV, MLR, ULSMV, WLSM and WLSMV cannot be used

for chi-square difference testing in the regular way. MLM, MLR and WLSM

chi-square difference testing is described on the Mplus website. MLMV, WLSMV,

and ULSMV difference testing is done using the DIFFTEST option.

RMSEA (Root Mean Square Error Of Approximation)

Estimate 0.031

90 Percent C.I. 0.017 0.044

Probability RMSEA <= .05 0.992

CFI/TLI

CFI 0.974

TLI 0.961

Chi-Square Test of Model Fit for the Baseline Model

Value 816.867

Degrees of Freedom 28

P-Value 0.0000

SRMR (Standardized Root Mean Square Residual)

Value 0.056

Optimum Function Value for Weighted Least-Squares Estimator

Value 0.13542069D-01

MODEL RESULTS

Two-Tailed

Estimate S.E. Est./S.E. P-Value

F1 BY

EURO1 1.000 0.000 999.000 999.000

EURO4 0.577 0.077 7.467 0.000

EURO7 0.557 0.064 8.753 0.000

EURO12 0.911 0.086 10.546 0.000

F2 BY

EURO2 1.000 0.000 999.000 999.000

EURO6 1.098 0.178 6.181 0.000

EURO10 0.963 0.151 6.361 0.000

EURO11 0.656 0.130 5.062 0.000

F2 WITH

F1 0.286 0.044 6.490 0.000

Thresholds

EURO1$1 0.086 0.037 2.328 0.020

EURO2$1 1.234 0.049 25.070 0.000

EURO4$1 1.239 0.049 25.108 0.000

EURO6$1 1.493 0.057 26.384 0.000

EURO7$1 0.447 0.038 11.659 0.000

EURO10$1 0.987 0.044 22.264 0.000

EURO11$1 1.198 0.048 24.752 0.000

EURO12$1 0.660 0.040 16.496 0.000

Variances

F1 0.705 0.073 9.607 0.000

F2 0.377 0.083 4.563 0.000

STANDARDIZED MODEL RESULTS

STDYX Standardization

Two-Tailed

Estimate S.E. Est./S.E. P-Value

F1 BY

EURO1 0.840 0.044 19.214 0.000

EURO4 0.485 0.058 8.412 0.000

EURO7 0.468 0.044 10.663 0.000

EURO12 0.765 0.043 17.882 0.000

F2 BY

EURO2 0.614 0.067 9.126 0.000

EURO6 0.674 0.075 8.985 0.000

EURO10 0.591 0.063 9.367 0.000

EURO11 0.403 0.069 5.871 0.000

F2 WITH

F1 0.554 0.065 8.500 0.000

- 1. PT

MODEL FIT INFORMATION

Number of Free Parameters 17

Chi-Square Test of Model Fit

Value 93.452*

Degrees of Freedom 19

P-Value 0.0000

* The chi-square value for MLM, MLMV, MLR, ULSMV, WLSM and WLSMV cannot be used

for chi-square difference testing in the regular way. MLM, MLR and WLSM

chi-square difference testing is described on the Mplus website. MLMV, WLSMV,

and ULSMV difference testing is done using the DIFFTEST option.

RMSEA (Root Mean Square Error Of Approximation)

Estimate 0.065

90 Percent C.I. 0.052 0.078

Probability RMSEA <= .05 0.028

CFI/TLI

CFI 0.940

TLI 0.911

Chi-Square Test of Model Fit for the Baseline Model

Value 1263.815

Degrees of Freedom 28

P-Value 0.0000

SRMR (Standardized Root Mean Square Residual)

Value 0.073

Optimum Function Value for Weighted Least-Squares Estimator

Value 0.38265438D-01

MODEL RESULTS

Two-Tailed

Estimate S.E. Est./S.E. P-Value

F1 BY

EURO1 1.000 0.000 999.000 999.000

EURO4 0.709 0.072 9.786 0.000

EURO7 0.636 0.057 11.072 0.000

EURO12 0.797 0.063 12.629 0.000

F2 BY

EURO2 1.000 0.000 999.000 999.000

EURO6 1.827 0.242 7.541 0.000

EURO10 1.237 0.174 7.116 0.000

EURO11 1.040 0.160 6.486 0.000

F2 WITH

F1 0.298 0.039 7.696 0.000

Thresholds

EURO1$1 -0.167 0.041 -4.034 0.000

EURO2$1 0.163 0.041 3.938 0.000

EURO4$1 1.414 0.060 23.488 0.000

EURO6$1 1.099 0.052 21.295 0.000

EURO7$1 0.402 0.042 9.493 0.000

EURO10$1 0.562 0.044 12.805 0.000

EURO11$1 0.807 0.046 17.397 0.000

EURO12$1 0.161 0.041 3.903 0.000

Variances

F1 0.817 0.069 11.817 0.000

F2 0.207 0.045 4.606 0.000

STANDARDIZED MODEL RESULTS

STDYX Standardization

Two-Tailed

Estimate S.E. Est./S.E. P-Value

F1 BY

EURO1 0.904 0.038 23.634 0.000

EURO4 0.641 0.057 11.193 0.000

EURO7 0.575 0.042 13.730 0.000

EURO12 0.720 0.037 19.331 0.000

F2 BY

EURO2 0.455 0.049 9.211 0.000

EURO6 0.832 0.057 14.529 0.000

EURO10 0.563 0.050 11.367 0.000

EURO11 0.474 0.055 8.561 0.000

F2 WITH

F1 0.723 0.047 15.512 0.000

- 1. SLVN

MODEL FIT INFORMATION

Number of Free Parameters 17

Chi-Square Test of Model Fit

Value 58.855*

Degrees of Freedom 19

P-Value 0.0000

* The chi-square value for MLM, MLMV, MLR, ULSMV, WLSM and WLSMV cannot be used

for chi-square difference testing in the regular way. MLM, MLR and WLSM

chi-square difference testing is described on the Mplus website. MLMV, WLSMV,

and ULSMV difference testing is done using the DIFFTEST option.

RMSEA (Root Mean Square Error Of Approximation)

Estimate 0.027

90 Percent C.I. 0.020 0.035

Probability RMSEA <= .05 1.000

CFI/TLI

CFI 0.985

TLI 0.977

Chi-Square Test of Model Fit for the Baseline Model

Value 2605.918

Degrees of Freedom 28

P-Value 0.0000

SRMR (Standardized Root Mean Square Residual)

Value 0.041

Optimum Function Value for Weighted Least-Squares Estimator

Value 0.82390473D-02

MODEL RESULTS

Two-Tailed

Estimate S.E. Est./S.E. P-Value

F1 BY

EURO1 1.000 0.000 999.000 999.000

EURO4 0.491 0.049 10.089 0.000

EURO7 0.647 0.039 16.769 0.000

EURO12 0.789 0.045 17.662 0.000

F2 BY

EURO2 1.000 0.000 999.000 999.000

EURO6 1.103 0.091 12.148 0.000

EURO10 1.067 0.085 12.557 0.000

EURO11 1.089 0.085 12.825 0.000

F2 WITH

F1 0.283 0.024 11.896 0.000

Thresholds

EURO1$1 0.207 0.024 8.681 0.000

EURO2$1 0.827 0.027 30.791 0.000

EURO4$1 1.487 0.036 41.163 0.000

EURO6$1 1.340 0.033 40.283 0.000

EURO7$1 0.550 0.025 21.978 0.000

EURO10$1 1.096 0.030 36.957 0.000

EURO11$1 1.330 0.033 40.186 0.000

EURO12$1 0.836 0.027 31.021 0.000

Variances

F1 0.840 0.048 17.414 0.000

F2 0.374 0.041 9.151 0.000

STANDARDIZED MODEL RESULTS

STDYX Standardization

Two-Tailed

Estimate S.E. Est./S.E. P-Value

F1 BY

EURO1 0.916 0.026 34.829 0.000

EURO4 0.450 0.041 10.974 0.000

EURO7 0.593 0.026 22.715 0.000

EURO12 0.723 0.026 27.527 0.000

F2 BY

EURO2 0.611 0.033 18.301 0.000

EURO6 0.674 0.039 17.108 0.000

EURO10 0.652 0.036 17.899 0.000

EURO11 0.666 0.038 17.354 0.000

F2 WITH

F1 0.506 0.033 15.115 0.000

- 1. EST

MODEL FIT INFORMATION

Number of Free Parameters 17

Chi-Square Test of Model Fit

Value 129.842*

Degrees of Freedom 19

P-Value 0.0000

* The chi-square value for MLM, MLMV, MLR, ULSMV, WLSM and WLSMV cannot be used

for chi-square difference testing in the regular way. MLM, MLR and WLSM

chi-square difference testing is described on the Mplus website. MLMV, WLSMV,

and ULSMV difference testing is done using the DIFFTEST option.

RMSEA (Root Mean Square Error Of Approximation)

Estimate 0.040

90 Percent C.I. 0.034 0.047

Probability RMSEA <= .05 0.994

CFI/TLI

CFI 0.960

TLI 0.941

Chi-Square Test of Model Fit for the Baseline Model

Value 2777.416

Degrees of Freedom 28

P-Value 0.0000

SRMR (Standardized Root Mean Square Residual)

Value 0.049

Optimum Function Value for Weighted Least-Squares Estimator

Value 0.14585673D-01

MODEL RESULTS

Two-Tailed

Estimate S.E. Est./S.E. P-Value

F1 BY

EURO1 1.000 0.000 999.000 999.000

EURO4 0.467 0.042 11.235 0.000

EURO7 0.674 0.041 16.623 0.000

EURO12 0.793 0.048 16.619 0.000

F2 BY

EURO2 1.000 0.000 999.000 999.000

EURO6 1.204 0.075 16.091 0.000

EURO10 0.964 0.067 14.336 0.000

EURO11 0.978 0.069 14.239 0.000

F2 WITH

F1 0.225 0.019 11.896 0.000

Thresholds

EURO1$1 0.048 0.021 2.300 0.021

EURO2$1 0.630 0.022 28.255 0.000

EURO4$1 1.011 0.025 40.294 0.000

EURO6$1 1.202 0.027 44.175 0.000

EURO7$1 0.363 0.021 17.072 0.000

EURO10$1 1.165 0.027 43.487 0.000

EURO11$1 1.134 0.026 42.962 0.000

EURO12$1 0.760 0.023 32.968 0.000

Variances

F1 0.693 0.044 15.831 0.000

F2 0.408 0.035 11.541 0.000

STANDARDIZED MODEL RESULTS

STDYX Standardization

Two-Tailed

Estimate S.E. Est./S.E. P-Value

F1 BY

EURO1 0.833 0.026 31.661 0.000

EURO4 0.389 0.031 12.586 0.000

EURO7 0.561 0.025 22.748 0.000

EURO12 0.660 0.026 25.106 0.000

F2 BY

EURO2 0.638 0.028 23.082 0.000

EURO6 0.769 0.030 25.567 0.000

EURO10 0.615 0.032 19.397 0.000

EURO11 0.624 0.031 20.298 0.000

F2 WITH

F1 0.424 0.031 13.642 0.000

- 1. HR

MODEL FIT INFORMATION

Number of Free Parameters 17

Chi-Square Test of Model Fit

Value 77.091*

Degrees of Freedom 19

P-Value 0.0000

* The chi-square value for MLM, MLMV, MLR, ULSMV, WLSM and WLSMV cannot be used

for chi-square difference testing in the regular way. MLM, MLR and WLSM

chi-square difference testing is described on the Mplus website. MLMV, WLSMV,

and ULSMV difference testing is done using the DIFFTEST option.

RMSEA (Root Mean Square Error Of Approximation)

Estimate 0.044

90 Percent C.I. 0.034 0.055

Probability RMSEA <= .05 0.799

CFI/TLI

CFI 0.972

TLI 0.959

Chi-Square Test of Model Fit for the Baseline Model

Value 2109.488

Degrees of Freedom 28

P-Value 0.0000

SRMR (Standardized Root Mean Square Residual)

Value 0.060

Optimum Function Value for Weighted Least-Squares Estimator

Value 0.19571962D-01

MODEL RESULTS

Two-Tailed

Estimate S.E. Est./S.E. P-Value

F1 BY

EURO1 1.000 0.000 999.000 999.000

EURO4 0.646 0.055 11.789 0.000

EURO7 0.704 0.047 15.066 0.000

EURO12 0.794 0.048 16.479 0.000

F2 BY

EURO2 1.000 0.000 999.000 999.000

EURO6 1.695 0.151 11.196 0.000

EURO10 1.088 0.115 9.481 0.000

EURO11 1.159 0.119 9.731 0.000

F2 WITH

F1 0.258 0.028 9.143 0.000

Thresholds

EURO1$1 0.167 0.032 5.230 0.000

EURO2$1 0.779 0.036 21.873 0.000

EURO4$1 1.528 0.050 30.680 0.000

EURO6$1 1.218 0.042 28.935 0.000

EURO7$1 0.430 0.033 13.063 0.000

EURO10$1 0.890 0.037 24.127 0.000

EURO11$1 1.198 0.042 28.727 0.000

EURO12$1 0.636 0.034 18.526 0.000

Variances

F1 0.865 0.057 15.187 0.000

F2 0.299 0.045 6.627 0.000

STANDARDIZED MODEL RESULTS

STDYX Standardization

Two-Tailed

Estimate S.E. Est./S.E. P-Value

F1 BY

EURO1 0.930 0.031 30.375 0.000

EURO4 0.601 0.046 13.084 0.000

EURO7 0.655 0.031 20.989 0.000

EURO12 0.738 0.030 25.003 0.000

F2 BY

EURO2 0.547 0.041 13.253 0.000

EURO6 0.927 0.040 23.081 0.000

EURO10 0.595 0.043 13.861 0.000

EURO11 0.634 0.045 14.020 0.000

F2 WITH

F1 0.507 0.038 13.388 0.000

1. Multiple-group confirmatory factor analysis (MGCFA): modification indices

Modification indices output for the strong invariance model:

MODEL MODIFICATION INDICES

NOTE: Modification indices for direct effects of observed dependent variables

regressed on covariates and residual covariances among observed dependent

variables may not be included. To include these, request MODINDICES (ALL).

Minimum M.I. value for printing the modification index 50.000

M.I. E.P.C. Std E.P.C. StdYX E.P.C.

Group AT

No modification indices above the minimum value.

Group DE

No modification indices above the minimum value.

Group SE

WITH Statements

EURO12 WITH EURO1 50.083 0.558 0.558 1.544

Group ES

BY Statements

F1 BY EURO12 52.758 0.981 0.945 0.755

F1 BY EURO2 66.233 -0.484 -0.466 -0.639

WITH Statements

EURO2 WITH EURO1 52.608 -0.614 -0.614 -2.338

EURO11 WITH EURO2 353.415 0.821 0.821 2.191

Means/Intercepts/Thresholds

[ EURO12$1 ] 56.845 -0.404 -0.404 -0.322

Group IT

BY Statements

F1 BY EURO1 55.103 8.289 10.487 3.082

F1 BY EURO4 89.127 -1.159 -1.467 -0.726

F1 BY EURO7 313.512 3.125 3.954 1.668

F1 BY EURO2 259.484 -1.209 -1.530 -1.194

F1 BY EURO10 77.841 1.114 1.409 0.576

F2 BY EURO2 349.802 -1.594 -3.741 -2.920

F2 BY EURO10 92.279 1.385 3.250 1.330

F2 BY EURO11 113.281 1.709 4.011 1.795

ON/BY Statements

F1 ON F2 /

F2 BY F1 999.000 0.000 0.000 0.000

F2 ON F2 /

F2 BY F2 999.000 0.000 0.000 0.000

WITH Statements

EURO4 WITH EURO1 56.240 -2.840 -2.840 -1.051

EURO7 WITH EURO1 52.169 2.370 2.370 0.649

EURO2 WITH EURO12 74.742 -0.862 -0.862 -0.975

EURO2 WITH EURO6 52.920 -2.519 -2.519 -1.275

EURO11 WITH EURO10 71.040 2.327 2.327 0.733

Means/Intercepts/Thresholds

[ EURO4$1 ] 89.160 2.479 2.479 1.227

[ EURO7$1 ] 272.096 -1.482 -1.482 -0.625

[ EURO2$1 ] 356.824 1.613 1.613 1.259

[ EURO10$1 ] 96.246 -1.462 -1.462 -0.598

[ EURO11$1 ] 99.828 -2.259 -2.259 -1.011

Group FR

BY Statements

F2 BY EURO4 80.130 1.749 0.509 0.295

Group GR

BY Statements

F1 BY EURO7 162.843 -1.553 -1.226 -0.991

F1 BY EURO12 181.391 1.925 1.520 1.272

F2 BY EURO7 119.703 -0.459 -0.719 -0.581

F2 BY EURO12 184.431 0.596 0.934 0.781

F2 BY EURO6 70.125 -1.446 -2.265 -0.644

F2 BY EURO11 153.465 1.414 2.215 1.696

WITH Statements

EURO7 WITH EURO1 55.158 -0.770 -0.770 -1.801

EURO12 WITH EURO1 73.988 0.928 0.928 2.429

EURO11 WITH EURO2 115.694 0.657 0.657 1.316

Means/Intercepts/Thresholds

[ EURO7$1 ] 168.830 0.797 0.797 0.644

[ EURO12$1 ] 180.945 -0.765 -0.765 -0.640

[ EURO6$1 ] 73.282 1.986 1.986 0.564

[ EURO11$1 ] 167.857 -2.094 -2.094 -1.603

Group CH

No modification indices above the minimum value.

Group BE

BY Statements

F1 BY EURO7 70.811 -1.111 -1.072 -0.750

F1 BY EURO6 77.195 0.855 0.825 0.418

F1 BY EURO2 95.081 -0.285 -0.275 -0.518

F1 BY EURO11 56.999 -0.367 -0.354 -0.437

F2 BY EURO7 50.555 0.886 0.706 0.494

F2 BY EURO2 72.220 -0.560 -0.446 -0.841

WITH Statements

EURO7 WITH EURO1 113.415 -1.768 -1.768 -2.064

EURO12 WITH EURO1 162.973 2.295 2.295 2.713

EURO6 WITH EURO7 53.974 1.058 1.058 0.598

Means/Intercepts/Thresholds

[ EURO7$1 ] 76.468 0.584 0.584 0.408

[ EURO2$1 ] 72.446 0.562 0.562 1.058

Group ISR

No modification indices above the minimum value.

Group CZ

No modification indices above the minimum value.

Group PL

WITH Statements

EURO11 WITH EURO2 66.257 0.517 0.517 0.485

Group LUX

No modification indices above the minimum value.

Group PT

ON/BY Statements

F1 ON F1 /

F1 BY F1 999.000 0.000 0.000 0.000

F1 ON F2 /

F2 BY F1 999.000 0.000 0.000 0.000

F2 ON F1 /

F1 BY F2 999.000 0.000 0.000 0.000

F2 ON F2 /

F2 BY F2 999.000 0.000 0.000 0.000

Variances/Residual Variances

EURO4 999.000 0.000 0.000 0.000

EURO7 999.000 0.000 0.000 0.000

F1 999.000 0.000 0.000 0.000

Group SLVN

No modification indices above the minimum value.

Group EST

BY Statements

F1 BY EURO7 142.671 1.593 1.283 0.919

F1 BY EURO12 166.114 -1.931 -1.555 -1.625

F1 BY EURO6 60.075 1.002 0.806 0.382

F2 BY EURO7 70.764 0.571 0.544 0.390

F2 BY EURO12 61.129 -0.460 -0.439 -0.459

F2 BY EURO2 205.976 0.759 0.723 1.110

F2 BY EURO10 167.292 -1.151 -1.096 -1.333

WITH Statements

EURO7 WITH EURO4 67.576 1.366 1.366 0.521

EURO11 WITH EURO2 293.311 0.575 0.575 1.353

Means/Intercepts/Thresholds

[ EURO7$1 ] 142.727 -0.806 -0.806 -0.577

[ EURO12$1 ] 169.285 0.777 0.777 0.813

[ EURO2$1 ] 206.904 -0.762 -0.762 -1.168

[ EURO10$1 ] 167.678 1.196 1.196 1.454

Group HR

No modification indices above the minimum value.

Modification indices output for the strict invariance model:

MODEL MODIFICATION INDICES

NOTE: Modification indices for direct effects of observed dependent variables

regressed on covariates and residual covariances among observed dependent

variables may not be included. To include these, request MODINDICES (ALL).

Minimum M.I. value for printing the modification index 50.000

M.I. E.P.C. Std E.P.C. StdYX E.P.C.

Group AT

BY Statements

F1 BY EURO11 129.118 -0.746 -0.590 -0.469

F2 BY EURO2 64.527 0.471 0.571 0.472

F2 BY EURO11 168.810 -0.904 -1.095 -0.872

Variances/Residual Variances

EURO2 141.892 -1.400 -1.400 -0.956

EURO11 182.134 1.181 1.181 0.749

Means/Intercepts/Thresholds

[ EURO7$1 ] 84.437 0.330 0.330 0.288

[ EURO2$1 ] 152.952 0.621 0.621 0.513

[ EURO11$1 ] 115.124 -0.496 -0.496 -0.395

Group DE

BY Statements

F2 BY EURO2 124.088 0.587 0.655 0.555

F2 BY EURO11 73.675 -0.526 -0.587 -0.481

Variances/Residual Variances

EURO2 210.437 -1.555 -1.555 -1.115

EURO11 51.993 0.572 0.572 0.384

Means/Intercepts/Thresholds

[ EURO2$1 ] 221.028 0.733 0.733 0.621

[ EURO10$1 ] 50.840 -0.326 -0.326 -0.270

Group SE

BY Statements

F1 BY EURO11 97.214 -0.573 -0.451 -0.372

F2 BY EURO7 72.359 0.246 0.268 0.234

F2 BY EURO2 89.156 0.549 0.598 0.510

F2 BY EURO11 135.434 -0.799 -0.871 -0.719

Variances/Residual Variances

EURO2 185.419 -1.507 -1.507 -1.096

EURO11 110.323 0.850 0.850 0.579

Means/Intercepts/Thresholds

[ EURO7$1 ] 72.902 0.308 0.308 0.269

[ EURO2$1 ] 218.807 0.722 0.722 0.616

[ EURO11$1 ] 70.114 -0.374 -0.374 -0.309

Group ES

BY Statements

F1 BY EURO6 69.918 0.821 0.942 0.504

F1 BY EURO2 154.911 -0.716 -0.821 -0.594

WITH Statements

EURO6 WITH EURO1 63.188 2.003 2.003 2.003

EURO2 WITH EURO1 76.230 -1.671 -1.671 -1.671

EURO2 WITH EURO12 63.009 -0.878 -0.878 -0.878

EURO11 WITH EURO2 268.323 1.820 1.820 1.820

Variances/Residual Variances

EURO7 75.834 -1.050 -1.050 -0.631

EURO12 59.300 1.054 1.054 0.421

EURO2 110.166 1.675 1.675 0.874

EURO11 67.187 -1.066 -1.066 -0.499

Means/Intercepts/Thresholds

[ EURO4$1 ] 61.455 0.422 0.422 0.340

[ EURO12$1 ] 82.419 -0.476 -0.476 -0.301

[ EURO2$1 ] 63.724 -0.458 -0.458 -0.331

Group IT

BY Statements

F1 BY EURO1 60.040 2.891 2.855 1.115

F1 BY EURO7 50.597 -0.407 -0.402 -0.329

F1 BY EURO6 51.351 0.703 0.695 0.408

F1 BY EURO2 143.473 -0.753 -0.744 -0.571

F2 BY EURO7 123.251 -0.373 -0.554 -0.454

F2 BY EURO2 163.643 -0.712 -1.058 -0.812

WITH Statements

EURO10 WITH EURO2 50.464 -0.656 -0.656 -0.656

Variances/Residual Variances

EURO7 407.078 2.573 2.573 1.725

Means/Intercepts/Thresholds

[ EURO1$1 ] 174.686 1.291 1.291 0.505

[ EURO7$1 ] 571.312 -0.925 -0.925 -0.757

[ EURO2$1 ] 179.493 0.720 0.720 0.552

[ EURO11$1 ] 72.449 -0.432 -0.432 -0.316

Group FR

BY Statements

F1 BY EURO7 58.934 -0.506 -0.443 -0.376

F1 BY EURO11 51.946 -0.379 -0.332 -0.282

F2 BY EURO4 75.488 0.541 0.538 0.468

Means/Intercepts/Thresholds

[ EURO2$1 ] 70.435 -0.392 -0.392 -0.342

Group GR

BY Statements

F1 BY EURO6 87.546 -1.206 -1.008 -0.580

F1 BY EURO11 53.886 0.586 0.489 0.353

F2 BY EURO7 59.097 -0.227 -0.348 -0.299

F2 BY EURO6 54.387 -0.679 -1.039 -0.598

F2 BY EURO10 64.684 -0.467 -0.715 -0.524

F2 BY EURO11 75.510 0.501 0.768 0.554

WITH Statements

EURO10 WITH EURO6 83.007 -1.053 -1.053 -1.053

EURO11 WITH EURO2 256.082 1.603 1.603 1.603

Variances/Residual Variances

EURO6 111.716 2.157 2.157 0.714

Means/Intercepts/Thresholds

[ EURO7$1 ] 82.982 0.332 0.332 0.286

[ EURO12$1 ] 154.406 -0.542 -0.542 -0.404

Group CH

No modification indices above the minimum value.

Group BE

BY Statements

F1 BY EURO6 68.598 0.609 0.542 0.398

F2 BY EURO12 171.983 -0.648 -0.642 -0.465

F2 BY EURO10 92.193 -0.626 -0.620 -0.532

WITH Statements

EURO12 WITH EURO7 71.244 -0.587 -0.587 -0.587

EURO11 WITH EURO2 71.838 0.614 0.614 0.614

Variances/Residual Variances

EURO12 130.308 1.572 1.572 0.825

EURO10 223.070 1.577 1.577 1.159

EURO11 151.678 -1.034 -1.034 -0.746

Means/Intercepts/Thresholds

[ EURO1$1 ] 65.994 0.741 0.741 0.316

[ EURO12$1 ] 157.396 -0.568 -0.568 -0.411

[ EURO2$1 ] 58.672 0.361 0.361 0.315

[ EURO10$1 ] 226.946 -0.657 -0.657 -0.563

[ EURO11$1 ] 150.796 0.529 0.529 0.450

Group ISR

No modification indices above the minimum value.

Group CZ

BY Statements

F1 BY EURO7 86.247 0.574 0.495 0.422

F1 BY EURO2 90.165 -0.589 -0.508 -0.415

F2 BY EURO7 119.202 0.287 0.360 0.307

F2 BY EURO2 194.172 -0.775 -0.972 -0.795

F2 BY EURO11 89.338 0.623 0.782 0.615

Variances/Residual Variances

EURO7 134.380 -1.368 -1.368 -0.995

EURO2 253.342 1.837 1.837 1.226

EURO11 131.927 -0.998 -0.998 -0.617

Means/Intercepts/Thresholds

[ EURO7$1 ] 85.375 0.341 0.341 0.290

[ EURO2$1 ] 189.144 -0.700 -0.700 -0.572

[ EURO11$1 ] 98.104 0.464 0.464 0.365

Group PL

Variances/Residual Variances

EURO10 55.633 -1.165 -1.165 -0.832

Group LUX

No modification indices above the minimum value.

Group PT

Means/Intercepts/Thresholds

[ EURO2$1 ] 74.117 -0.321 -0.321 -0.280

Group SLVN

Means/Intercepts/Thresholds

[ EURO2$1 ] 57.243 -0.389 -0.389 -0.313

Group EST

BY Statements

F1 BY EURO6 51.315 0.657 0.542 0.340

F2 BY EURO4 191.481 -0.532 -0.713 -0.630

WITH Statements

EURO11 WITH EURO2 116.237 0.959 0.959 0.959

Variances/Residual Variances

EURO4 570.753 1.916 1.916 1.495

EURO12 59.506 -1.068 -1.068 -0.600

EURO2 230.033 2.190 2.190 1.397

EURO10 216.975 -1.977 -1.977 -1.192

Means/Intercepts/Thresholds

[ EURO4$1 ] 552.241 -1.135 -1.135 -1.002

[ EURO7$1 ] 71.755 -0.307 -0.307 -0.265

[ EURO12$1 ] 237.813 0.673 0.673 0.505

[ EURO2$1 ] 355.529 -0.972 -0.972 -0.776

[ EURO10$1 ] 282.397 0.809 0.809 0.628

Group HR

No modification indices above the minimum value.

1. Alignment optimization

Parameter estimates, noninvariance, and aligned latent (factor) means for factor 1 (affective suffering). The group values in parenthesis designate the countries:

11=at 12=de 13=se 15=es 16=it 17=fr 19=gr 20=ch 23=be 25=isr 28=cz 29=pl 31=lux 33=pt 34=slvn 35=est 47=hr

MODEL RESULTS

Two-Tailed

Estimate S.E. Est./S.E. P-Value

Latent Class 1 (11)

F1 BY

EURO1 4.556 3.475 1.311 0.190

EURO4 0.686 0.094 7.293 0.000

EURO7 0.589 0.091 6.448 0.000

EURO12 0.982 0.157 6.264 0.000

Means

F1 -0.336 0.191 -1.759 0.079

Thresholds

EURO1$1 -0.596 0.313 -1.906 0.057

EURO4$1 1.591 0.103 15.390 0.000

EURO7$1 0.794 0.092 8.623 0.000

EURO12$1 0.578 0.144 4.024 0.000

Variances

F1 0.648 0.228 2.846 0.004

Latent Class 2 (12)

F1 BY

EURO1 3.664 1.544 2.373 0.018

EURO4 0.650 0.086 7.528 0.000

EURO7 0.564 0.076 7.443 0.000

EURO12 1.111 0.146 7.595 0.000

Means

F1 -0.220 0.164 -1.344 0.179

Thresholds

EURO1$1 -0.657 0.379 -1.736 0.083

EURO4$1 1.558 0.106 14.646 0.000

EURO7$1 0.467 0.093 5.016 0.000

EURO12$1 0.738 0.168 4.380 0.000

Variances

F1 0.717 0.158 4.525 0.000

Latent Class 3 (13)

F1 BY

EURO1 26.077 15.983 1.632 0.103

EURO4 0.568 0.089 6.373 0.000

EURO7 0.633 0.083 7.635 0.000

EURO12 1.087 0.107 10.198 0.000

Means

F1 -0.322 0.046 -7.014 0.000

Thresholds

EURO1$1 -0.372 0.253 -1.474 0.140

EURO4$1 1.347 0.039 34.885 0.000

EURO7$1 0.765 0.032 23.800 0.000

EURO12$1 0.576 0.037 15.577 0.000

Variances

F1 0.494 0.106 4.670 0.000

Latent Class 4 (15)

F1 BY

EURO1 3.729 1.289 2.894 0.004

EURO4 0.628 0.086 7.321 0.000

EURO7 0.778 0.110 7.077 0.000

EURO12 1.027 0.147 6.977 0.000

Means

F1 -0.543 0.113 -4.806 0.000

Thresholds

EURO1$1 -0.486 0.221 -2.200 0.028

EURO4$1 1.668 0.069 24.093 0.000

EURO7$1 0.613 0.077 7.956 0.000

EURO12$1 0.374 0.097 3.838 0.000

Variances

F1 1.196 0.296 4.035 0.000

Latent Class 5 (16)

F1 BY

EURO1 1.539 0.267 5.760 0.000

EURO4 0.530 0.074 7.141 0.000

EURO7 0.604 0.069 8.816 0.000

EURO12 1.254 0.170 7.384 0.000

Means

F1 -0.246 0.137 -1.797 0.072

Thresholds

EURO1$1 0.104 0.197 0.529 0.597

EURO4$1 1.389 0.072 19.267 0.000

EURO7$1 0.045 0.080 0.565 0.572

EURO12$1 0.734 0.155 4.730 0.000

Variances

F1 1.131 0.277 4.087 0.000

Latent Class 6 (17)

F1 BY

EURO1 2.035 0.474 4.296 0.000

EURO4 0.668 0.079 8.425 0.000

EURO7 0.465 0.066 7.101 0.000

EURO12 1.143 0.123 9.266 0.000

Means

F1 -0.149 0.122 -1.222 0.222

Thresholds

EURO1$1 -0.315 0.239 -1.320 0.187

EURO4$1 1.425 0.076 18.700 0.000

EURO7$1 0.403 0.060 6.746 0.000

EURO12$1 0.697 0.136 5.142 0.000

Variances

F1 0.961 0.221 4.347 0.000

Latent Class 7 (19)

F1 BY

EURO1 5.447 3.502 1.556 0.120

EURO4 0.643 0.075 8.621 0.000

EURO7 0.539 0.071 7.639 0.000

EURO12 1.093 0.118 9.301 0.000

Means

F1 -0.291 0.081 -3.579 0.000

Thresholds

EURO1$1 -0.348 0.273 -1.271 0.204

EURO4$1 1.470 0.054 27.331 0.000

EURO7$1 0.658 0.043 15.147 0.000

EURO12$1 0.365 0.072 5.064 0.000

Variances

F1 0.672 0.160 4.206 0.000

Latent Class 8 (20)

F1 BY

EURO1 2.055 0.608 3.382 0.001

EURO4 0.628 0.088 7.164 0.000

EURO7 0.579 0.084 6.926 0.000

EURO12 1.179 0.159 7.429 0.000

Means

F1 -0.480 0.132 -3.647 0.000

Thresholds

EURO1$1 -0.448 0.226 -1.982 0.048

EURO4$1 1.561 0.081 19.317 0.000

EURO7$1 0.476 0.068 6.985 0.000

EURO12$1 0.565 0.118 4.770 0.000

Variances

F1 0.655 0.177 3.692 0.000

Latent Class 9 (23)

F1 BY

EURO1 3.697 1.024 3.610 0.000

EURO4 0.711 0.113 6.309 0.000

EURO7 0.579 0.088 6.579 0.000

EURO12 1.017 0.156 6.521 0.000

Means

F1 -0.182 0.090 -2.037 0.042

Thresholds

EURO1$1 -0.109 0.296 -0.367 0.713

EURO4$1 1.405 0.057 24.494 0.000

EURO7$1 0.537 0.047 11.348 0.000

EURO12$1 0.405 0.077 5.248 0.000

Variances

F1 0.737 0.197 3.734 0.000

Latent Class 10 (25)

F1 BY

EURO1 2.123 0.650 3.263 0.001

EURO4 0.737 0.125 5.912 0.000

EURO7 0.602 0.080 7.511 0.000

EURO12 1.051 0.121 8.679 0.000

Means

F1 -0.548 0.129 -4.240 0.000

Thresholds

EURO1$1 -0.247 0.215 -1.151 0.250

EURO4$1 1.480 0.078 19.002 0.000

EURO7$1 0.117 0.071 1.664 0.096

EURO12$1 0.589 0.096 6.147 0.000

Variances

F1 1.248 0.305 4.088 0.000

Latent Class 11 (28)

F1 BY

EURO1 3.461 1.027 3.371 0.001

EURO4 0.549 0.089 6.170 0.000

EURO7 1.003 0.141 7.093 0.000

EURO12 1.087 0.118 9.207 0.000

Means

F1 -0.286 0.093 -3.075 0.002

Thresholds

EURO1$1 -0.468 0.247 -1.893 0.058

EURO4$1 1.419 0.054 26.469 0.000

EURO7$1 0.670 0.080 8.345 0.000

EURO12$1 0.596 0.086 6.961 0.000

Variances

F1 0.541 0.131 4.139 0.000

Latent Class 12 (29)

F1 BY

EURO1 2.344 0.756 3.100 0.002

EURO4 0.638 0.086 7.407 0.000

EURO7 0.791 0.108 7.327 0.000

EURO12 1.067 0.134 7.978 0.000

Means

F1 -0.044 0.147 -0.302 0.763

Thresholds

EURO1$1 -0.512 0.305 -1.681 0.093

EURO4$1 1.467 0.082 17.957 0.000

EURO7$1 0.270 0.117 2.301 0.021

EURO12$1 1.048 0.163 6.414 0.000

Variances

F1 1.132 0.266 4.250 0.000

Latent Class 13 (31)

F1 BY

EURO1 2.656 1.126 2.360 0.018

EURO4 0.581 0.100 5.831 0.000

EURO7 0.582 0.074 7.815 0.000

EURO12 1.220 0.170 7.176 0.000

Means

F1 -0.173 0.131 -1.321 0.186

Thresholds

EURO1$1 -0.242 0.334 -0.727 0.468

EURO4$1 1.281 0.098 13.131 0.000

EURO7$1 0.398 0.080 5.002 0.000

EURO12$1 0.742 0.149 4.964 0.000

Variances

F1 0.721 0.194 3.714 0.000

Latent Class 14 (33)

F1 BY

EURO1 2.447 0.882 2.775 0.006

EURO4 0.635 0.104 6.107 0.000

EURO7 0.667 0.077 8.648 0.000

EURO12 1.108 0.144 7.665 0.000

Means

F1 0.000 0.000 999.000 999.000

Thresholds

EURO1$1 -0.435 0.174 -2.493 0.013

EURO4$1 1.675 0.099 16.915 0.000

EURO7$1 0.484 0.053 9.152 0.000

EURO12$1 0.242 0.064 3.789 0.000

Variances

F1 1.000 0.000 999.000 999.000

Latent Class 15 (34)

F1 BY

EURO1 3.733 1.314 2.840 0.005

EURO4 0.473 0.098 4.844 0.000

EURO7 0.745 0.121 6.166 0.000

EURO12 1.120 0.177 6.336 0.000

Means

F1 -0.343 0.124 -2.768 0.006

Thresholds

EURO1$1 -0.538 0.314 -1.712 0.087

EURO4$1 1.458 0.068 21.525 0.000

EURO7$1 0.410 0.094 4.361 0.000

EURO12$1 0.812 0.133 6.126 0.000

Variances

F1 0.837 0.232 3.610 0.000

Latent Class 16 (35)

F1 BY

EURO1 1.800 0.326 5.528 0.000

EURO4 0.507 0.077 6.592 0.000

EURO7 0.770 0.098 7.872 0.000

EURO12 1.156 0.121 9.548 0.000

Means

F1 -0.223 0.161 -1.381 0.167

Thresholds

EURO1$1 -0.315 0.278 -1.132 0.258

EURO4$1 0.982 0.083 11.775 0.000

EURO7$1 0.258 0.121 2.131 0.033

EURO12$1 0.792 0.176 4.499 0.000

Variances

F1 0.674 0.161 4.198 0.000

Latent Class 17 (47)

F1 BY

EURO1 2.366 0.678 3.490 0.000

EURO4 0.641 0.072 8.941 0.000

EURO7 0.866 0.132 6.575 0.000

EURO12 1.032 0.130 7.920 0.000

Means

F1 -0.350 0.130 -2.695 0.007

Thresholds

EURO1$1 -0.363 0.259 -1.400 0.161

EURO4$1 1.620 0.090 17.916 0.000

EURO7$1 0.284 0.102 2.793 0.005

EURO12$1 0.582 0.110 5.284 0.000

Variances

F1 1.114 0.280 3.985 0.000

APPROXIMATE MEASUREMENT INVARIANCE (NONINVARIANCE) FOR GROUPS

Intercepts/Thresholds

EURO1$1 11 12 13 15 (16) 17 19 20 23 25 28 29 31 33 34 35 47

EURO4$1 11 12 13 15 16 17 19 20 23 25 28 29 31 33 34 (35) 47

EURO7$1 11 12 13 15 (16) (17) 19 20 23 (25) 28 (29) (31) 33 34 (35) (47)

EURO12$1 11 12 13 15 16 17 (19) 20 (23) 25 28 (29) 31 (33) 34 35 47

Loadings for F1

EURO1 11 12 13 15 16 17 19 20 23 25 28 29 31 33 34 35 47

EURO4 11 12 13 15 16 17 19 20 23 25 28 29 31 33 34 35 47

EURO7 11 12 13 15 16 (17) 19 20 23 25 28 29 31 33 34 35 47

EURO12 11 12 13 15 16 17 19 20 23 25 28 29 31 33 34 35 47

FACTOR MEAN COMPARISON AT THE 5% SIGNIFICANCE LEVEL IN DESCENDING ORDER

Results for Factor F1

Latent Group Factor

Ranking Class Value Mean Groups With Significantly Smaller Factor Mean

1 14 33 0.000 23 28 19 13 34 47 20 15 25

2 12 29 -0.044 28 19 13 34 47 20 15 25

3 6 17 -0.149 34 47 20 15 25

4 13 31 -0.173 34 20 15 25

5 9 23 -0.182 34 20 15 25

6 2 12 -0.220 20 15 25

7 16 35 -0.223 20 15 25

8 5 16 -0.246 20 15 25

9 11 28 -0.286 20 15 25

10 7 19 -0.291 15 25

11 3 13 -0.322 15 25

12 1 11 -0.336

13 15 34 -0.343 15 25

14 17 47 -0.350 25

15 8 20 -0.480

16 4 15 -0.543

17 10 25 -0.548

Parameter estimates, noninvariance, and aligned latent (factor) means for factor 2 (motivation). The group values in parenthesis designate the countries:

11=at 12=de 13=se 15=es 16=it 17=fr 19=gr 20=ch 23=be 25=isr 28=cz 29=pl 31=lux 33=pt 34=slvn 35=est 47=hr

MODEL RESULTS

Two-Tailed

Estimate S.E. Est./S.E. P-Value

Latent Class 1 (11)

F2 BY

EURO2 0.539 0.128 4.209 0.000

EURO6 0.939 0.196 4.804 0.000

EURO10 0.633 0.092 6.880 0.000

EURO11 0.301 0.073 4.155 0.000

Means

F2 -1.613 0.284 -5.678 0.000

Thresholds

EURO6$1 0.891 0.172 5.193 0.000

EURO2$1 0.875 0.120 7.283 0.000

EURO10$1 0.412 0.107 3.849 0.000

EURO11$1 0.625 0.084 7.436 0.000

Variances

F2 1.743 0.563 3.095 0.002

Latent Class 2 (12)

F2 BY

EURO2 0.614 0.152 4.050 0.000

EURO6 0.820 0.135 6.071 0.000

EURO10 0.707 0.155 4.553 0.000

EURO11 0.398 0.099 4.035 0.000

Means

F2 -1.609 0.381 -4.220 0.000

Thresholds

EURO6$1 0.934 0.254 3.673 0.000

EURO2$1 0.836 0.201 4.164 0.000

EURO10$1 0.163 0.229 0.710 0.478

EURO11$1 0.749 0.131 5.695 0.000

Variances

F2 1.276 0.471 2.710 0.007

Latent Class 3 (13)

F2 BY

EURO2 0.666 0.140 4.751 0.000

EURO6 0.820 0.172 4.756 0.000

EURO10 0.675 0.125 5.381 0.000

EURO11 0.445 0.109 4.077 0.000

Means

F2 -1.308 0.242 -5.411 0.000

Thresholds

EURO6$1 0.769 0.134 5.753 0.000

EURO2$1 0.858 0.157 5.462 0.000

EURO10$1 0.512 0.165 3.106 0.002

EURO11$1 0.679 0.104 6.542 0.000

Variances

F2 0.908 0.281 3.230 0.001

Latent Class 4 (15)

F2 BY

EURO2 0.673 0.096 7.010 0.000

EURO6 0.878 0.133 6.604 0.000

EURO10 0.564 0.083 6.782 0.000

EURO11 0.947 0.140 6.762 0.000

Means

F2 -1.017 0.173 -5.878 0.000

Thresholds

EURO6$1 0.826 0.126 6.568 0.000

EURO2$1 0.210 0.096 2.175 0.030

EURO10$1 0.431 0.082 5.258 0.000

EURO11$1 0.874 0.139 6.293 0.000

Variances

F2 2.315 0.612 3.780 0.000

Latent Class 5 (16)

F2 BY

EURO2 0.477 0.075 6.389 0.000

EURO6 0.920 0.129 7.150 0.000

EURO10 0.639 0.079 8.124 0.000

EURO11 0.813 0.127 6.419 0.000

Means

F2 -0.603 0.146 -4.129 0.000

Thresholds

EURO6$1 1.119 0.114 9.784 0.000

EURO2$1 0.719 0.063 11.470 0.000

EURO10$1 0.424 0.074 5.756 0.000

EURO11$1 0.668 0.099 6.775 0.000

Variances

F2 2.002 0.521 3.845 0.000

Latent Class 6 (17)

F2 BY

EURO2 0.730 0.131 5.559 0.000

EURO6 0.853 0.150 5.693 0.000

EURO10 0.625 0.085 7.365 0.000

EURO11 0.684 0.136 5.013 0.000

Means

F2 -0.817 0.172 -4.753 0.000

Thresholds

EURO6$1 1.134 0.129 8.790 0.000

EURO2$1 0.197 0.104 1.901 0.057

EURO10$1 0.426 0.091 4.688 0.000

EURO11$1 0.767 0.108 7.130 0.000

Variances

F2 0.933 0.271 3.445 0.001

Latent Class 7 (19)

F2 BY

EURO2 0.819 0.117 6.975 0.000

EURO6 0.700 0.104 6.752 0.000

EURO10 0.600 0.073 8.241 0.000

EURO11 1.313 0.195 6.719 0.000

Means

F2 -0.622 0.149 -4.185 0.000

Thresholds

EURO6$1 0.717 0.088 8.174 0.000

EURO2$1 0.336 0.100 3.354 0.001

EURO10$1 0.445 0.075 5.955 0.000

EURO11$1 0.782 0.145 5.411 0.000

Variances

F2 1.470 0.371 3.961 0.000

Latent Class 8 (20)

F2 BY

EURO2 0.867 0.351 2.471 0.013

EURO6 0.806 0.189 4.271 0.000

EURO10 0.622 0.101 6.176 0.000

EURO11 0.809 0.294 2.748 0.006

Means

F2 -1.523 0.300 -5.082 0.000

Thresholds

EURO6$1 0.897 0.237 3.781 0.000

EURO2$1 0.365 0.305 1.196 0.232

EURO10$1 0.448 0.153 2.932 0.003

EURO11$1 0.668 0.191 3.506 0.000

Variances

F2 0.618 0.259 2.389 0.017

Latent Class 9 (23)

F2 BY

EURO2 0.700 0.120 5.846 0.000

EURO6 0.748 0.126 5.954 0.000

EURO10 0.612 0.086 7.083 0.000

EURO11 1.332 0.292 4.569 0.000

Means

F2 -1.068 0.177 -6.043 0.000

Thresholds

EURO6$1 0.844 0.112 7.531 0.000

EURO2$1 0.409 0.104 3.915 0.000

EURO10$1 0.236 0.097 2.431 0.015

EURO11$1 0.779 0.154 5.069 0.000

Variances

F2 0.698 0.182 3.837 0.000

Latent Class 10 (25)

F2 BY

EURO2 0.336 0.072 4.643 0.000

EURO6 0.797 0.134 5.956 0.000

EURO10 1.316 0.361 3.651 0.000

EURO11 0.912 0.138 6.621 0.000

Means

F2 -0.758 0.153 -4.948 0.000

Thresholds

EURO6$1 1.034 0.097 10.707 0.000

EURO2$1 0.566 0.059 9.598 0.000

EURO10$1 0.391 0.119 3.284 0.001

EURO11$1 0.794 0.100 7.906 0.000

Variances

F2 1.443 0.462 3.125 0.002

Latent Class 11 (28)

F2 BY

EURO2 0.399 0.084 4.749 0.000

EURO6 0.977 0.243 4.022 0.000

EURO10 0.537 0.113 4.736 0.000

EURO11 0.916 0.133 6.908 0.000

Means

F2 -1.831 0.363 -5.050 0.000

Thresholds

EURO6$1 0.815 0.136 6.010 0.000

EURO2$1 0.252 0.088 2.866 0.004

EURO10$1 0.422 0.089 4.721 0.000

EURO11$1 1.066 0.146 7.286 0.000

Variances

F2 1.841 0.659 2.793 0.005

Latent Class 12 (29)

F2 BY

EURO2 0.704 0.127 5.546 0.000

EURO6 0.512 0.178 2.880 0.004

EURO10 0.731 0.229 3.198 0.001

EURO11 0.732 0.202 3.619 0.000

Means

F2 -0.307 0.171 -1.794 0.073

Thresholds

EURO6$1 1.183 0.098 12.123 0.000

EURO2$1 0.237 0.102 2.330 0.020

EURO10$1 0.745 0.134 5.570 0.000

EURO11$1 0.503 0.140 3.584 0.000

Variances

F2 1.109 0.515 2.153 0.031

Latent Class 13 (31)

F2 BY

EURO2 0.692 0.225 3.079 0.002

EURO6 0.897 0.216 4.148 0.000

EURO10 0.627 0.122 5.128 0.000

EURO11 0.540 0.184 2.944 0.003

Means

F2 -1.219 0.259 -4.707 0.000

Thresholds

EURO6$1 0.930 0.214 4.355 0.000

EURO2$1 0.667 0.209 3.184 0.001

EURO10$1 0.406 0.112 3.637 0.000

EURO11$1 0.709 0.150 4.716 0.000

Variances

F2 1.041 0.362 2.874 0.004

Latent Class 14 (33)

F2 BY

EURO2 0.823 0.137 6.001 0.000

EURO6 0.562 0.110 5.087 0.000

EURO10 0.637 0.110 5.797 0.000

EURO11 0.895 0.154 5.800 0.000

Means

F2 0.000 0.000 999.000 999.000

Thresholds

EURO6$1 1.260 0.079 15.921 0.000

EURO2$1 0.211 0.055 3.824 0.000

EURO10$1 0.664 0.061 10.966 0.000

EURO11$1 1.082 0.101 10.757 0.000

Variances

F2 1.000 0.000 999.000 999.000

Latent Class 15 (34)

F2 BY

EURO2 0.588 0.102 5.786 0.000

EURO6 0.741 0.125 5.920 0.000

EURO10 0.682 0.105 6.469 0.000

EURO11 0.940 0.146 6.460 0.000

Means

F2 -1.301 0.204 -6.390 0.000

Thresholds

EURO6$1 0.810 0.117 6.920 0.000

EURO2$1 0.239 0.091 2.626 0.009

EURO10$1 0.515 0.116 4.446 0.000

EURO11$1 0.755 0.135 5.574 0.000

Variances

F2 1.375 0.379 3.630 0.000

Latent Class 16 (35)

F2 BY

EURO2 0.940 0.165 5.698 0.000

EURO6 0.781 0.107 7.321 0.000

EURO10 0.609 0.075 8.148 0.000

EURO11 0.840 0.130 6.467 0.000

Means

F2 -0.917 0.242 -3.793 0.000

Thresholds

EURO6$1 0.879 0.157 5.586 0.000

EURO2$1 0.052 0.192 0.273 0.785

EURO10$1 0.849 0.128 6.611 0.000

EURO11$1 0.785 0.165 4.757 0.000

Variances

F2 1.251 0.336 3.721 0.000

Latent Class 17 (47)

F2 BY

EURO2 0.675 0.113 6.001 0.000

EURO6 0.938 0.173 5.416 0.000

EURO10 0.562 0.100 5.600 0.000

EURO11 0.908 0.151 6.029 0.000

Means

F2 -1.106 0.190 -5.827 0.000

Thresholds

EURO6$1 0.816 0.134 6.074 0.000

EURO2$1 0.262 0.103 2.559 0.011

EURO10$1 0.457 0.092 4.981 0.000

EURO11$1 0.785 0.131 5.977 0.000

Variances

F2 1.499 0.422 3.553 0.000

APPROXIMATE MEASUREMENT INVARIANCE (NONINVARIANCE) FOR GROUPS

Intercepts/Thresholds

EURO6$1 11 12 13 15 16 (17) 19 20 23 25 28 29 31 33 34 35 47

EURO2$1 (11) (12) (13) 15 (16) 17 19 20 23 (25) 28 29 31 33 34 35 47

EURO10$1 11 12 13 15 16 17 19 20 23 25 28 29 31 33 34 (35) 47

EURO11$1 11 12 13 15 16 17 19 20 23 25 (28) 29 31 33 34 35 47

Loadings for F2

EURO6 11 12 13 15 16 17 19 20 23 25 28 29 31 33 34 35 47

EURO2 11 12 13 15 (16) 17 19 20 23 (25) (28) 29 31 33 34 35 47

EURO10 11 12 13 15 16 17 19 20 23 25 28 29 31 33 34 35 47

EURO11 (11) (12) (13) 15 16 17 19 20 23 25 28 29 31 33 34 35 47

FACTOR MEAN COMPARISON AT THE 5% SIGNIFICANCE LEVEL IN DESCENDING ORDER

Results for Factor F2

Latent Group Factor

Ranking Class Value Mean Groups With Significantly Smaller Factor Mean

1 14 33 0.000 16 19 25 17 35 15 23 47 31 34

13 20 12 11 28

2 12 29 -0.307 25 17 35 15 23 47 31 34 13 20

12 11 28

3 5 16 -0.603 17 35 15 23 47 31 34 13 20 12

11 28

4 7 19 -0.622 35 15 23 47 31 34 13 20 12 11

28

5 10 25 -0.758 23 47 31 34 13 20 12 11 28

6 6 17 -0.817 15 23 47 31 34 13 20 12 11 28

7 16 35 -0.917 34 13 20 12 11 28

8 4 15 -1.017 34 13 20 12 11 28

9 9 23 -1.068 20 11 28

10 17 47 -1.106 11 28

11 13 31 -1.219

12 15 34 -1.301

13 3 13 -1.308

14 8 20 -1.523

15 2 12 -1.609

16 1 11 -1.613

17 11 28 -1.831
